**Exogenous application of KNO<sub>3</sub> elevates the salinity tolerance of *Stevia rebaudiana* through ion homeostasis mechanism**

Mitali Mahajan<sup>1,2</sup>, Surbhi Sharma<sup>1</sup>, Pawan Kumar<sup>3</sup> and Probir Kumar Pal<sup>1,2\*</sup>

<sup>1</sup>Division of Agrotechnology of Medicinal, Aromatic and Commercially Important Plants, Council of Scientific and Industrial Research-Institute of Himalayan Bioresource Technology (CSIR-IHBT), Post Box No. 6, Palampur- 176 061, HP, India.

<sup>2</sup>Academy of Scientific and Innovative Research (AcSIR), CSIR-IHBT, Post Box No. 6, Palampur- 176 061, HP, India.

<sup>3</sup>Division of Natural Product Chemistry and Process Development, Council of Scientific and Industrial Research-Institute of Himalayan Bioresource Technology (CSIR-IHBT), Post Box No. 6, Palampur- 176 061, HP, India.

\* Corresponding author: Probir Kumar Pal, Tel.: +91 1894 233 341/ (M) 9805551007, fax: +91 1894 230 428. E-mail: [pkpal\\_agat@yahoo.in](mailto:pkpal_agat@yahoo.in) / [palpk@ihbt.res.in](mailto:palpk@ihbt.res.in)

Mitali Mahajan: [mitalimahajan89@gmail.com](mailto:mitalimahajan89@gmail.com)

Surbhi Sharma: [surbhi25sharma@gmail.com](mailto:surbhi25sharma@gmail.com)

Pawan Kumar: [pawankumar@ihbt.res.in](mailto:pawankumar@ihbt.res.in)

Probir Kumar Pal: [pkpal\\_agat@yahoo.in](mailto:pkpal_agat@yahoo.in) / [palpk@ihbt.res.in](mailto:palpk@ihbt.res.in)

**Short Running Title:** Exogenous application of KNO<sub>3</sub> improved the salinity stress

**Number of tables: 05**

**Number of figures: 07 (5, 6, 7 will be colour online-only)**

**Number of Words (start of the introduction to the end of the acknowledgements): 6502**

**Supplementary data: two tables (Table S1 and S2) and one figure (Fig S1)**

## **Exogenous application of KNO<sub>3</sub> elevates the salinity tolerance of *Stevia rebaudiana* through ion homeostasis mechanism**

### **Highlight**

The detrimental effects of moderate and higher salinity levels on growth and dry leaf yield of stevia were observed. However, tolerance level can be elevated through exogenous application of KNO<sub>3</sub>.

### **Abstract**

Though relatively little is understood of adaptation, physiological and metabolic changes of *Stevia rebaudiana* under exposure to salinity stress, it is hypothesized that exogenous application of potassium (K<sup>+</sup>) could elevates the salinity tolerance through ions homeostasis. Thus, an experiment was conducted with twenty treatment combinations comprising four salinity levels (irrigation with normal water as control and three level of NaCl at 40, 80 and 120 mM) and five different concentrations of KNO<sub>3</sub> (0.0, 2.5, 5.0, 7.5, and 10.0 g L<sup>-1</sup>). Dry leaf yield was not negatively affected with mild salinity (40 mM). However, the detrimental effects were observed at moderate and higher salinity levels (80 and 120 mM). The uptakes of K<sup>+</sup>, Ca<sup>2+</sup>, and N were significantly reduced at higher salinity level, whereas accumulations of Na<sup>+</sup> and Cl<sup>-</sup> ions in plant tissues were substantially increased. Proline content in leaf was also increased significantly ( $P \leq 0.05$ ) in response to salt stress. Among the foliar application, KNO<sub>3</sub> at 5.0 gL<sup>-1</sup> registered significantly ( $P \leq 0.05$ ) higher dry leaf yield compared with control. Exogenous application of K<sup>+</sup> under moderate salinity stress maintained ion balance in cytosol, particularly K: Na. Thus, the salinity tolerance of stevia can be elevated to some extent through exogenous application of K<sup>+</sup>.

**Keywords:** KNO<sub>3</sub>, Proline, Salinity stress, *Stevia rebaudiana*, Steviol glycosides, Total phenols,

## 1 **1. Introduction**

2 The burgeoning rate of diabetic and obesity patients is a serious apprehension in the  
3 worldwide. About 346 million people worldwide are in the grip of diabetes whereas in India  
4 69.2 million people are diabetic (WHO 2015). The cane sugar is not recommended for  
5 consumption to the diabetic and obesity patients. In these circumstances, stevia (*Stevia*  
6 *rebaudiana*) has emerged to be a natural sweet gift for millions of diabetics as a sweet  
7 quotient in their daily life. The stevia leaves contain sweet-tasting and low-calorie  
8 diterpenoid steviol glycosides (SGs), which are nearly 300 times sweeter than sucrose  
9 (Kinghorn 2002). However, the performance of stevia in saline soil or plant irrigated with  
10 saline water is not properly elucidated so far. The global extent of salt-affected land amounts  
11 to about 1128 million ha (FAO 2008). The term salt affected refers to the soils that are saline  
12 or sodic, which is one of the major stress factors for agriculture in consequence of climate  
13 change. Salinity stress alone adversely affects to the production in over 30% of irrigated  
14 crops and 7% of dryland agriculture worldwide (Schroeder *et al.* 2013). Development of  
15 agrotechniques to elevate the salt-tolerance within plant or cultivation of salt-tolerant crops  
16 may be an efficient approach for better utilization of salt-affected land to address the related  
17 issues.

18 The restriction of plant growth in the saline soil is directly linked to osmotic potential of the  
19 soil solution and total concentration of soluble salts, and the different mechanisms have been  
20 developed by the plants to cope with these situations (Munns 2002; Tavakkoli *et al.* 2011).  
21 The presence of higher concentration of NaCl in soils increases the accumulation of the  
22 phytotoxic ions sodium ( $\text{Na}^+$ ) and chloride ( $\text{Cl}^-$ ) in plant organs, concurrently reduces the  
23 uptake of other essential nutrients, such as potassium ( $\text{K}^+$ ), calcium ( $\text{Ca}^{2+}$ ), magnesium  
24 ( $\text{Mg}^{2+}$ ) and nitrate ( $\text{NO}_3^-$ ) ion (Niu *et al.* 1995; Cornillon and Palloix, 1997; Halperin *et al.*  
25 2003; Munns and Tester 2008; James *et al.* 2011). The imbalance of ions creates the decisive  
26 conditions for plant survival by intercepting different plant mechanisms. Thus, plant  
27 accumulates various osmolytes (proline, glycine betaine and sugars), secondary metabolites  
28 and antioxidants in response to stress which helps in the survival of the plant through  
29 maintaining plant turgor (Ashraf and Foolad 2007).  
30 Salt stress restricts the N assimilate in plant body through the attenuation of activity of cyto-  
31 solic NADH nitrate reductase enzyme in nitrate assimilation pathway (Sivasankar and Oaks  
32 1996; Jabeen and Ahmad 2011). Potassium is another important macronutrient for optimum

33 growth and development of the plant. Potassium also plays important role in maintenance of  
34 osmotic adjustment during stress conditions. It is established fact that  $K^+$  concentration in  
35 plant tissue declines as the  $Na^+$  concentration in the root media is increased (Subbarao *et al.*  
36 1990; Izzo *et al.* 1991; Perez- Alfocea *et al.* 1996). This disruption of  $K^+$  further disturbs  
37 many metabolic processes in the cytoplasm (Marschner 1995).

38 Thus, the mechanisms to salinity tolerance should be understood properly to elevate salt  
39 tolerance for a particular plant species for cultivation in salt affected areas. Exclusion of  
40 surplus  $Na^+$  or compartmentalization and ion homeostasis are the basic mechanisms of salt  
41 tolerance for plants (Li *et al.* 2006; Munns and Tester 2008). So, the exogenous application of  
42 nutrients particularly  $K^+$  and  $NO_3^-$  through foliar feeding under saline conditions may be an  
43 effective mechanism to reduce  $Na^+$  and  $Cl^-$  injury and to elevate tolerance against saline to  
44 various extents. Foliar spray is an efficient approach, which involves active and passive  
45 processes for translocation of nutrients through leaves to other organs of plant when nutrient  
46 uptake from soil is disturbed (Fageria *et al.* 2009).

47 However, the degree of salinity tolerance depends upon plant species. Very few research  
48 works have been conducted to understand the effect of salinity on growth, the extent of  
49 tolerance and mechanism of tolerance in stevia. Similarly, the attempt toward elevating the  
50 salinity tolerance of stevia has not been initiated so far. Thus, the present experiment was  
51 executed with the specific objectives of (i) determining the degree of tolerance and  
52 understanding the effects of salinity on the growth, biochemical activities, and steviol  
53 glycoside accumulation; (ii) evaluating the effectiveness of exogenous application of K and N  
54 to elevate the salinity tolerance in *S. rebaudiana*.

55

## 56 **2. Materials and Methods**

### 57 ***2.1. Experimental location, plant material and application of treatments***

58 A pot experiment was conducted in the open-ended poly-tunnel at CSIR-Institute of  
59 Himalayan Bioresource Technology, Palampur, India during two growing seasons of 2016  
60 and 2017. The physico-chemical properties of the experimental soil are presented in **Table 1**.  
61 Sixty-days-old stevia seedlings were selected randomly from uniform populations maintained  
62 in a poly-house under natural light for transplantation into the pot containing 14 kg soil. For  
63 basal dose, 690 mg N as urea, 136 mg P as single super phosphate, and 311 mg K were

64 applied to the pots. At twentieth-days of transplantation, plants were taped in order to  
65 maintain the uniform height. The experiment was carried out in two- factor factorial complete  
66 randomized design (CRD) with ten replications. The study includes twenty treatment  
67 combinations involving four salinity levels of irrigation water (irrigation with normal water  
68 as control and three level of NaCl at 40, 80 and 120 mM) and five different concentrations of  
69 KNO<sub>3</sub> (water spray as control, KNO<sub>3</sub> at 2.5, 5.0, 7.5, and 10.0 g L<sup>-1</sup>) . After transplanting,  
70 plants were irrigated with normal tap water. Thereafter, individual plants were irrigated  
71 treatment wise as per requirement throughout the experimental period. The foliar spray of  
72 KNO<sub>3</sub> for different treatments was initiated at 10<sup>th</sup> day after first salinity treatment. Distilled  
73 water was used for water spray as control treatment. The foliar spray of KNO<sub>3</sub> solutions took  
74 place at the interval of 10 days for three times.

## 75 **2.2. Growth and yield**

76 The five plants were randomly harvested after 90 days of transplantation from each treatment.  
77 After recording plant height (cm) and number of branches per plant, the leaves were  
78 separated from the stems. Leaf area (LA) of individual plant sample was measured with the  
79 help of Windias-3 Image analysis system (Delta-T Devices Ltd. UK). The fresh weight of  
80 leaf, stem and root were also recorded immediately. Then, the samples were dried at 70 °C± 2  
81 °C in hot air oven until constant weight was attained in order to measure the dry weight.  
82 Specific leaf weight (SLW) was also calculated based on leaf area and dry leaf weight, and it  
83 was expressed in mg cm<sup>-2</sup>. The dried leaf, stem and root samples were stored for further  
84 chemical and biochemical analysis.

## 85 **2.3. Chlorophyll (Chl) analysis**

86 The leaves were collected from each pot at harvesting stage for estimation of Chl content in  
87 the leaf. The Chl was extracted from 200 mg fresh leaf samples with a 25 mL of 80% acetone  
88 (v/v) and was kept under dark conditions at room temperature for 24 h to avoid  
89 photooxidation. The absorbance of the extract was recorded at two different wavelengths i.e.  
90 645 nm and 663 nm with a UV/Vis spectrophotometer (Shimadzu, UV-2600). The Chl<sub>a</sub>, Chl<sub>b</sub>  
91 and total Chl content (mg g<sup>-1</sup>) were determined by using standard equations given by Arnon  
92 (1949).

## 93 **2.4. Determination of Proline**

94 The accumulation of proline in leaf was quantified as per the method recommended by Bates  
95 *et al.* (1973). The proline was extracted from 0.5 g fresh leaf samples of stevia with 10 mL of  
96 3 % sulphosalicylic acid and then, centrifuged at 12000 g for 10 minutes. 1 mL supernatant  
97 was reacted with the equal volume of acid-ninhydrin and glacial acetic acid in a test tube and  
98 incubated for 1 h at 100° C. The reaction was stopped by keeping the test tube in an icebath.  
99 Then, 2 mL toluene was added to test tube and mixed vigorously and left it undisturbed for 30  
100 minutes at room temperature. After that, the sample mixture was separated into two phases.  
101 The optical density of the chromophore containing toluene was measured at 520 nm with  
102 spectrophotometer (model T 90 C UV/vis, PG Instrument Ltd.). The proline content was  
103 determined based on standard curves developed with D-proline.

#### 104 **2.5. Total phenols**

105 For the analysis of total phenols, 0.1 g of leaf sample was suspended in 25 mL solution of  
106 70% acetone in a conical flask. The conical flask was kept on shaking water bath at 37° C for  
107 2 h. After that, the homogenate was centrifuged at 10000 g for 20 minutes. The supernatant  
108 was filtered and collected in a test tube. 1 mL of the extract was taken into a 25 mL  
109 volumetric flask, then, 0.5 mL of 1 N Folin-Ciocalteu and 2.5 mL of 35% sodium carbonate  
110 were added. The final volume was made up to 25 mL with distilled water. After vortex, the  
111 flasks were left in dark conditions at room temperature for 40 minutes for colour  
112 development. The intensity of purplish-blue colour was measured at 730 nm with  
113 spectrophotometer. A standard curve, prepared with gallic acid, was used for the estimation  
114 of total phenols content, and results were expressed as mg gallic acid equivalent (GAE) per g  
115 dry leaf.

#### 116 **2.6. Steviol glycosides analysis**

117 For the estimation of SGs content in stevia leaves, the collected leaf samples were dried at  
118  $40 \pm 2^\circ$  C in a hot air oven until constant weight was achieved. The dried leaf samples were  
119 powdered by a grinder. 100 mg of prepared samples were immersed in 10 mL methanol for  
120 24 h, then filtered. The filtrate was vacuum dried under reduced pressure, after that defatted  
121 with n-hexane. Defatted sample was dissolved in 10 mL high-performance liquid  
122 chromatography (HPLC) - grade acetonitrile and water (1:1) mobile phase, then filtered with  
123 micro filter (0.22  $\mu$ m pore diameter). The filtrate was used for the determination of important  
124 eight steviol glycosides i.e. stevioside, Reb-A, Reb-F, Reb-C, dulcoside-A, rubusoside, Reb-  
125 B and steviolbioside (SB) by Ultra HPLC system (LC-MS Shimadzu, 2020 system). The

126 system is equipped with LC-30 AD auto detector, quaternary pump, SIL-30 AC autosampler,  
127 Degaser Unit DGU-20 A5R, reverse phase C18 column and SPD-M 30A diode array  
128 detector. The temperature of column was set at 30° C. The used mobile phase was the  
129 combination of A (5 mM ammonium acetate and 12 ppm equivalent v/v of formic acid) and  
130 B (pure acetonitrile) with a ratio of 70: 30 and flowed at the rate of 0.24 mL min<sup>-1</sup> for 20  
131 minutes. The detection wavelength was 210 nm. The steviol glycosides were quantified based  
132 on the standard curves developed with the standard sample of stevioside, Reb-A, Reb-F, Reb-  
133 C, dulcoside-A, rubusoside, Reb-B, and steviolbioside.

### 134 ***2.7. Determination of plant mineral ion in different plant organs***

135 For understanding spatial distribution of N, P, K<sup>+</sup>, calcium (Ca<sup>2+</sup>), Na<sup>+</sup> and Cl<sup>-</sup> in different  
136 plant parts, the dried leaf, stem and root samples were grounded in a grinder to pass through a  
137 40 mesh screens. The total N content was estimated by micro-kjeldahl method after the  
138 digestion of plant samples in concentrated sulphuric acid. For the estimation of other ions (P,  
139 K<sup>+</sup>, Ca<sup>2+</sup>, and Na<sup>+</sup>), the samples were digested with a mixture of concentrated nitric acid,  
140 sulphuric acid and perchloric acid (9:4:1). The total P in leaf, stem and root samples was  
141 determined with a spectrophotometer (model T 90+ UV/ vis, PG Instrument Ltd.), whereas a  
142 flame photometer (model BWB XP, BWB technologies UK Ltd., UK) was used for the  
143 estimation of total K<sup>+</sup>, Na<sup>+</sup>, and Ca<sup>2+</sup> as per the protocols recommended by Prasad *et al.*  
144 (2006). The Cl<sup>-</sup> ion was analyzed by the titration method prescribed by Husband and Godden  
145 (1927).

### 146 ***2.8. Statistical analysis***

147 The growth, yield and biochemical data obtained from this investigation for consecutive 2  
148 years were subjected to analysis of variance (ANOVA) with the help of Statistica 7 software  
149 (Stat Soft Inc., Tulsa, Oklahoma, USA) for estimating the variance components of main  
150 effects (salinity level and foliar application of KNO<sub>3</sub>) and their reciprocal interactions effects.  
151 The least significant difference value was used to separate the treatment means when *F-test*  
152 was significant ( $P \leq 0.05$ ). A second-degree-polynomial regression model was used to  
153 establish the relations between salinity level and dry leaf yield, and foliar application of  
154 KNO<sub>3</sub> and dry leaf yield of stevia. Agronomic traits, SGs profile, biochemical traits and ions  
155 accumulation were also subjected to the principal component analysis (PCA) to understand  
156 those, which were largely influenced by the treatment combinations.

## 157 **3. Results**

### 158 **3.1. Yield attributes**

159 The major yield attributes of the stevia viz. plant height, number of branches and LA were  
160 significantly ( $P \leq 0.05$ ) influenced by the salinity levels and foliar spray of  $\text{KNO}_3$  during both  
161 the cropping seasons (**Table 2**). Averaged across the  $\text{KNO}_3$  levels, plants treated with high  
162 concentration of  $\text{NaCl}$  ( $\geq 80$  mM) showed significantly ( $P \leq 0.05$ ) lower plant height, number  
163 of branches and leaf area as compared with the plants irrigated with the non-saline water as  
164 control. Compared with control, irrigation of high saline water ( $\text{NaCl}$  at 120 mM) reduced  
165 plant height by 10.86 and 12.58 %, number of branches by 24.26 and 31.29 % and LA by  
166 20.90 and 20.89% in 1<sup>st</sup> and 2<sup>nd</sup> cropping seasons respectively. On the same time, application  
167 of  $\text{KNO}_3$  at  $5.0 \text{ g L}^{-1}$  registered maximum height (70.18 and 67.58 cm), number of branches  
168 (7.17 and 7.33 No. plant<sup>-1</sup>) and LA (390.92 and 407.66 cm<sup>2</sup>), which are significantly ( $P \leq$   
169 0.05) different from the water spray as control in both years. The interaction effects between  
170 salinity levels and  $\text{KNO}_3$  on plant height and number of branch were insignificant ( $P \geq 0.05$ ),  
171 but significant ( $P \leq 0.05$ ) effect was observed in LA during both cropping years (**Table 2**).

### 172 **3.2. Leaf, stem and root biomass yield**

173 Averaged across the  $\text{KNO}_3$  levels, yield (leaf, stem and root biomass) response to salinity  
174 levels varied significantly ( $P \leq 0.05$ ) as salinity increased up to  $\text{NaCl}$  at 120 mM (**Table 3**)  
175 during both growing seasons. Irrespective of  $\text{KNO}_3$  application, the maximum dry leaf yield  
176 of stevia ( $6.02$  and  $5.93 \text{ g plant}^{-1}$ ) was found with the plant irrigated with low salinity water  
177 ( $\text{NaCl}$  at 40 mM) but remained on par ( $P \geq 0.05$ ) with control. In 1<sup>st</sup> season, the reductions in  
178 dry leaf yield with high salinity level ( $\text{NaCl}$  at 120 mM) compared with control and low  
179 salinity ( $\text{NaCl}$  at 40 mM) were 23.80 and 26.07 %, respectively. Irrespective of foliar  
180 application of  $\text{KNO}_3$ , plant irrigated with  $\text{NaCl}$  at 120 mM reduced root biomass significantly  
181 ( $P \leq 0.05$ ) compared with control by about 31 and 36 % in 1<sup>st</sup> and 2<sup>nd</sup> cropping season,  
182 respectively. Averaged across of salinity levels, yield (leaf, stem and root biomass) of stevia  
183 in response to foliar application of  $\text{KNO}_3$  increased significantly ( $P \leq 0.05$ ) as the  
184 concentration increased up to at  $5.0 \text{ g L}^{-1}$ , thereafter decline trend was observed during both  
185 growing seasons (**Table 3**). The increases in dry leaf yield with  $\text{KNO}_3$  at  $5.0 \text{ g L}^{-1}$  over water  
186 spray as control were 26.59 and 33.04 % in 1<sup>st</sup> and 2<sup>nd</sup> years, respectively.



187 Significant ( $P \leq 0.05$ ) interactions of salinity levels and  $\text{KNO}_3$  application on dry leaf and  
188 stem yield and root biomass occurred in both seasons (**Table 3**). At control (irrigated with  
189 normal water) and low salinity level (NaCl at 40 mM), dry leaf, stem and root biomass  
190 increased as concentration of  $\text{KNO}_3$  increased from 0 to  $5.0 \text{ g L}^{-1}$ , while the reverse trend was  
191 observed with further increases in  $\text{KNO}_3$  concentration. However, at moderate salinity level  
192 (NaCl at 80 mM), dry leaf yield was increased with corresponding increase in concentration  
193 of  $\text{KNO}_3$  up to  $10.0 \text{ g L}^{-1}$  (**Table 3**).

### 194 **3.3. Chlorophyll (Chl) concentration in leaf**

195 The photosynthetic pigments ( $\text{Chl}_a$ ,  $\text{Chl}_b$ , total  $\text{Chl}_{a+b}$ , and  $\text{Chl}_a : \text{Chl}_b$ ) in stevia leaf as  
196 influenced by saline levels and foliar application of  $\text{KNO}_3$  are presented in **Fig1 a-d**.  
197 Averaged over  $\text{KNO}_3$  level, there were significant ( $P \leq 0.05$ ) differences among the salinity  
198 levels in concentration of  $\text{Chl}_a$ ,  $\text{Chl}_b$ , total, and Chl, during both years. The concentrations of  
199 photosynthetic pigments were gradually decreased at higher salinity level, irrespective of  
200 foliar spray. Averaged across the salinity levels, the effects of foliar application of  $\text{KNO}_3$  on  
201  $\text{Chl}_a$ ,  $\text{Chl}_b$  and total Chl content in leaves were significant ( $P \leq 0.05$ ) in both years. The  $\text{Chl}_a$   
202 and total Chl contents in leaves were increased with the increasing concentration of  $\text{KNO}_3$  up  
203 to  $5.0 \text{ g L}^{-1}$  in both seasons (**Fig. 1a, c**).

204 The interaction effects between salinity levels and foliar application of  $\text{KNO}_3$  on  $\text{Chl}_a$  and  
205 total Chl content in leaves were found significant ( $P \leq 0.05$ ) in both years (**Table 4**). At low  
206 salinity levels (control and NaCl at 40 mM), although total Chl contents were higher with  
207 foliar application of  $\text{KNO}_3$  at  $5.0 \text{ g L}^{-1}$  than in water spray control in 2<sup>nd</sup> year, but these  
208 differences were statistically insignificant ( $P \geq 0.05$ ). On the other hand, the foliar application  
209 of  $\text{KNO}_3$  at  $5.0 \text{ g L}^{-1}$  registered significantly ( $P \leq 0.05$ ) higher total Chl content in leaves  
210 compared with water spray control (**Table 4**) at higher salinity level (NaCl at 80 and 120  
211 mM).

### 212 **3.4. Accumulation of total phenols and proline in leaf**

213 Averaged over the  $\text{KNO}_3$  levels, at 40 mM NaCl, total phenols ( $41.53$  and  $37.07 \text{ mg g}^{-1}$ )  
214 content in leaves was 19.75 and 15.35 % higher than that of control ( $34.68$  and  $31.38 \text{ mg}$   
215  $\text{g}^{-1}$ ) in 1<sup>st</sup> and 2<sup>nd</sup> cropping seasons, respectively (**Fig. 1e**). It has also been observed that a  
216 significant ( $P \leq 0.05$ ) decrease in total phenols content in leaves was occurred in parallel with  
217 further increase in NaCl concentration, and about 27 and 40 % decreases were registered in

218 the plants subjected to NaCl at 120 mM compared with the plants treated with NaCl at 40  
219 mM in 1<sup>st</sup> and 2<sup>nd</sup> cropping seasons, respectively. Averaged over salinity level, the maximum  
220 value (48.29 mg g<sup>-1</sup>) was observed with KNO<sub>3</sub> at 5.0 g L<sup>-1</sup>, which was 36.22 % higher than  
221 control in 2016. In 2017, by increasing the concentration of KNO<sub>3</sub> from control to 7.5 g L<sup>-1</sup>,  
222 the concentration of total phenols was increased from 28.97 to 36.35 mg g<sup>-1</sup>. As NaCl  
223 concentration was increased, in parallel accumulation of proline content was increased (**Fig.**  
224 **2f**). Averaged across salinity level, there was a significant ( $P \leq 0.05$ ) difference in proline  
225 content between the leaves treated with water spray and higher concentration of KNO<sub>3</sub> (at 5.0  
226 and 7.5 g L<sup>-1</sup>). At 7.5 g L<sup>-1</sup> KNO<sub>3</sub>, 31.99 % and 17.54 % increases were observed in proline  
227 content compared with control in 2016 and 2017, respectively. However, proline content was  
228 sharply decreased with KNO<sub>3</sub> at 10.0 g L<sup>-1</sup> (**Fig. 1f**).

229 Significant ( $P \leq 0.05$ ) interaction effects between salinity level and KNO<sub>3</sub> on total phenols  
230 and proline content in stevia leaves were occurred in both years (**Table 4**). In 1<sup>st</sup> season, total  
231 phenols content was significantly increased with KNO<sub>3</sub> at 5.0 g L<sup>-1</sup> compared with water  
232 spray and higher concentration of KNO<sub>3</sub> (10.0 g L<sup>-1</sup>) under non-saline (control) and low  
233 saline (NaCl at 40 mM) conditions. Proline content was not significantly ( $P \geq 0.05$ )  
234 influenced by the foliar application of KNO<sub>3</sub> at low salinity level (NaCl at 40 mM), whereas  
235 significantly ( $P \leq 0.05$ ) higher amount was recorded with KNO<sub>3</sub> at 10.0 g L<sup>-1</sup> compared with  
236 water spray under non-saline condition in 1<sup>st</sup> year. On the other hand, at moderate salinity  
237 level (NaCl at 80 mM), proline content was increased with the corresponding increase in  
238 concentration of KNO<sub>3</sub> up to 7.5 g L<sup>-1</sup> (**Table 4**).

### 239 **3.5. Ions distribution in leaf, stem and root**

240 At harvest stage, ions (N, P, K<sup>+</sup>, Ca<sup>2+</sup>, Na<sup>+</sup> and Cl<sup>-</sup>) accumulation patterns in leaf, stem and  
241 root as influenced by different salinity levels and foliar applications of KNO<sub>3</sub> are presented in  
242 **Fig. 2 and 3**. Averaged over KNO<sub>3</sub> level, concentration of N in leaf was significantly ( $P \leq$   
243 0.05) decreased from 19.18 and 14.37 mg g<sup>-1</sup> to 17.36 and 11.8 mg g<sup>-1</sup> at higher salinity level  
244 (NaCl at 120 mM) in 2016 and 2017 cropping seasons, respectively (**Fig. 2a**). In root,  
245 significantly ( $P \leq 0.05$ ) higher amount (11.90 and 11.53 mg g<sup>-1</sup>) of N was recorded with  
246 plants treated with NaCl at 80 mM compared with NaCl at 120 mM. Regardless of KNO<sub>3</sub>  
247 level, the maximum K<sup>+</sup> contents in leaf (24.40 and 24.75 mg g<sup>-1</sup>), stem (25.04 and 23.74 mg  
248 g<sup>-1</sup>), and root (19.22 and 21.02 mg g<sup>-1</sup>) were registered with the plants irrigated with low  
249 salinity water (NaCl at 40 mM); however, sharply decreased with NaCl at 120 mM during

250 both growing seasons(**Fig. 2e**). The  $\text{Ca}^{2+}$  uptake was also reduced significantly ( $P \leq 0.05$ ) in  
251 the plants treated with high concentration of NaCl (120 mM) (**Fig. 2g**).

252 Averaged over  $\text{KNO}_3$  level, the effects of salinity level on the accumulation of  $\text{Na}^+$  and  $\text{Cl}^-$   
253 in leaf, stem and root were found to be significant ( $P \leq 0.05$ ) in both years (**Fig. 3a,c**). As  
254 NaCl concentration was increased, in parallel accumulations of  $\text{Na}^+$  and  $\text{Cl}^-$  in leaf, stem and  
255 root were increased. Averaged across  $\text{KNO}_3$  level the maximum and lowest values of  $\text{K}^+ : \text{Na}^+$   
256 and  $\text{Ca}^{2+} : \text{Na}^+$  in all parts (except  $\text{K}^+ : \text{Na}^+$  in stem in 2016 and  $\text{Ca}^{2+} : \text{Na}^+$  in leaf in 2017) were  
257 registered with control (irrigated with non-saline water) and NaCl at 120 mM, respectively  
258 (**Fig. 3e, g**).

259 On the other hand, pooled across salinity level, the accumulation patterns of N and  $\text{Ca}^{2+}$  in  
260 leaf, stem and root were gradually increased with increasing the level of  $\text{KNO}_3$  concentration  
261 up to  $5.0 \text{ g L}^{-1}$ , thereafter decline trend was observed in both the cropping seasons (**Fig. 2b,**  
262 **h**). On the other hand, pooled across all salinity environments, accumulation of K in leaf was  
263 significantly ( $P \leq 0.05$ ) higher with  $\text{KNO}_3$  at  $5.0 \text{ g L}^{-1}$  compared with rest of the treatments in  
264 both seasons (**Fig. 2f**). Pooled across the salinity level, accumulations of  $\text{Na}^+$  and  $\text{Cl}^-$  in all  
265 plant organs were sharply declined with corresponding increases of  $\text{KNO}_3$  level (**Fig. 3b, d**).  
266 On the other hand, the ratios of  $\text{K}^+ : \text{Na}^+$  in leaf, stem and root were influenced significantly  
267 ( $P \leq 0.05$ ) by the foliar application of  $\text{KNO}_3$ , and the lowest values were registered with  
268 water spray as control, which were significantly ( $P \leq 0.05$ ) different from the application of  
269  $\text{KNO}_3$  at  $5.0 \text{ g L}^{-1}$  and higher concentration (**Fig. 3f**). In some cases (particularly  $\text{K}^+$  and  $\text{Na}^+$   
270 in leaf), the significant ( $P \leq 0.05$ ) interaction effects between salinity and  $\text{KNO}_3$  level on ions  
271 accumulation were also observed (**Table 4**).

### 272 **3.6. Accumulation of Steviol glycosides (SGs):**

273 Total eight SGs namely stevioside, Reb-A, Reb-F, Reb-C, dulcoside-A, rubusoside, Reb-B,  
274 and steviolbioside were analyzed in this experiment to understand the influence of salinity  
275 stress and foliar application of  $\text{KNO}_3$ . Here, most two prominent SGs, Stevioside and Reb-A,  
276 and total SGs are presented in **Fig. 4a, b**. In case of total steviol glycosides (TSGs), the sum  
277 of eight aforesaid mentioned SGs has been considered. The plants treated with low salinity  
278 water (NaCl at 40 mM) accumulated significantly ( $P \leq 0.05$ ) higher amount of stevioside  
279 ( $48.43$  and  $39.35 \text{ mg g}^{-1}$  dry leaf) compared with the plants treated with moderate (NaCl at 80  
280 mM) and high salinity (NaCl at 120 mM) water in both years (**Fig. 4a**). Reb-A content was  
281 also significantly ( $P \geq 0.05$ ) influenced by salinity level, and high salinity level (NaCl at 120

282 mM) produced significant lower Reb-A (17.38 and 18.34 mg g<sup>-1</sup>) compared with non-salinity  
283 treatment in both years (**Fig.4b**). In case of TSGs yield (g plant<sup>-1</sup>), there was no significant ( $P$   
284  $\geq 0.05$ ) difference between low saline (NaCl at 40 mM) water treated plants and non-saline  
285 water treated plants in 1<sup>st</sup> and 2<sup>nd</sup> cropping season (**Fig.4d**).

286 Averaged over salinity levels, there were no significant ( $P \leq 0.05$ ) differences among the  
287 KNO<sub>3</sub> levels for accumulation of stevioside in 1<sup>st</sup> year. However, significant ( $P \leq 0.05$ )  
288 differences among the KNO<sub>3</sub> levels were observed in 2<sup>nd</sup> year, and the maximum (39.58 mg  
289 g<sup>-1</sup>) value was recorded with KNO<sub>3</sub> at 5.0 g L<sup>-1</sup> (**Fig.4b**). Irrespective of salinity levels, the  
290 maximum quantity of Reb-A (24.75 and 24.80 mg g<sup>-1</sup>) was also recorded with KNO<sub>3</sub> at 5.0 g  
291 L<sup>-1</sup>, which was significantly ( $P \leq 0.05$ ) higher than control during both years. Significant ( $P \leq$   
292 0.05) variations in the TSGs yield (g plant<sup>-1</sup>) in response to different KNO<sub>3</sub> levels were found  
293 during both years, and the maximum yield (0.52 and 0.49 g plant<sup>-1</sup>) was recorded with the  
294 application of KNO<sub>3</sub> at 5.0 g L<sup>-1</sup> (**Fig. 4d**).

295 The interaction effects between salinity levels and foliar applications of KNO<sub>3</sub> on  
296 accumulation of stevioside, Reb-A and TSGs and TSGs yield (g plant<sup>-1</sup>) were found to be  
297 significant ( $P \leq 0.05$ ) in both seasons (**Table 5**). Effect of KNO<sub>3</sub> on accumulation of  
298 stevioside was significant ( $P \leq 0.05$ ) under non-saline condition (control) in both years, and  
299 the maximum value was recorded with KNO<sub>3</sub> at 5.0 g L<sup>-1</sup> (62.85 and 43.72 mg g<sup>-1</sup>). Under  
300 other salinity levels, accumulation patterns of stevioside due to foliar application of KNO<sub>3</sub>  
301 were found to be irregular.

### 302 **3.7. Correlation, regression and principle component analysis**

303 The statistical relationships among the agronomic traits (Plant height, number of branch, LA,  
304 SLW, dry root, stem and leaf yield) were presented in a correlation matrix (**Table S1**). The  
305 data revealed that most of the agronomic traits were positively correlated with each other.

306 The relationship of dry leaf yield of stevia with the concentration of KNO<sub>3</sub> was best  
307 described by the second-degree curve (**Fig.5**) with regression equations as given below:

$$308 Y_{(2016)} = 4.658 + 0.435 * X - 0.0422 * X^2 \quad (R^2 = 0.890^*)$$

$$309 Y_{(2017)} = 4.517 + 0.493X - 0.0491 X^2 \quad (R^2 = 0.738)$$

310 The dry leaf yield was increased with the corresponding increase in concentration of KNO<sub>3</sub>  
311 up to 5.0 g L<sup>-1</sup>, and thereafter trend was declined in both the years.

312 In this investigation, the principle component analysis (PCA) was conducted on six  
313 agronomic traits (plant height, branch, leaf area, dry root yield, dry leaf yield, dry stem yield)

314 and eleven chemical and biochemical parameters (total Chl, total phenols, proline, N, P, K<sup>+</sup>,  
315 Ca<sup>2+</sup>, Na<sup>+</sup>, Cl<sup>-</sup>, K: Na, Ca: Na) of stevia to understand the interaction effects of treatment  
316 combination on these traits and their relationship (**Fig. 6 a-d**). The data revealed that the first  
317 two principal components (PC<sub>1</sub> and PC<sub>2</sub>) were cumulatively accounted for 80.32% and 80.07  
318 % of the total variations for the 1<sup>st</sup> and 2<sup>nd</sup> year, respectively.

319 Another PCA was carried out on steviol glycosides (stevioside, Reb-A, Reb-F, Reb-C, SB,  
320 TSGs) and biochemical traits (total Chl, total phenols, proline, N, P, K<sup>+</sup>, Ca<sup>2+</sup>, Na<sup>+</sup>, Cl<sup>-</sup>) to  
321 study the relationships among them. The PCA showed that the 1<sup>st</sup> and 2<sup>nd</sup> component (PC<sub>1</sub>  
322 and PC<sub>2</sub>) cumulatively explained 61.62% and 60.77% variations for 1<sup>st</sup> and 2<sup>nd</sup> cropping  
323 years, respectively (**Fig. 7 a-d**). The relationships among the variables (different steviol  
324 glycosides and biochemical traits) were presented in the space of the first two components  
325 (PC<sub>1</sub> and PC<sub>2</sub>). During 1<sup>st</sup> year Reb-F, Reb-C, proline, Na<sup>+</sup> and Cl<sup>-</sup> were separated from rest  
326 of variables by the PC<sub>1</sub> and placed in negative coordinate (**Fig. 7a**). However, the PCA bi-  
327 plot (**Fig. 7b**) did not categorize the treatment combinations in any define clusters.

328 There were significant ( $P \leq 0.05$ ) differences in the soil pH and EC in response to different  
329 salinity levels in both the cropping seasons (**Fig. S1**). The status of available P, K<sup>+</sup>, Ca<sup>2+</sup>, Na<sup>+</sup>  
330 and Cl<sup>-</sup> ions in the soil after harvest were significantly ( $P \leq 0.05$ ) affected by the salinity  
331 levels in both the cropping seasons, whereas available N content was significantly ( $P \leq 0.05$ )  
332 affected only in 2<sup>nd</sup> cropping season (**Table S2**).

#### 333 **4. Discussion:**

334 In salt-sensitive plant species, the growth inhibition is a common fact under saline conditions.  
335 In this experiment, plant height, number of branches and leaf area were significantly ( $P \leq$   
336 0.05) reduced by NaCl at 120 mM. This result may be attributed to the accumulation of  
337 excess amount of Na<sup>+</sup> in the older leaves, concurrently it reduces the uptake of other essential  
338 nutrients, such as potassium (K<sup>+</sup>), calcium (Ca<sup>2+</sup>), magnesium (Mg<sup>2+</sup>) and nitrate (NO<sub>3</sub><sup>-</sup>) ions  
339 from the soil. Accumulation of excess amount of Na<sup>+</sup> in the older leaves inhibits growth by  
340 accelerating their death consequently decreases the supply of carbohydrates to the  
341 meristematic regions (Munns 2002). In the present experiment, accumulation of Na<sup>+</sup> in the  
342 leaves was increased by about 33- 40% with NaCl at 120 mM compared with control (**Fig.**  
343 **3a**).

344 The reduction in dry leaf yield with high salinity level (NaCl at 120 mM) was mainly due to  
345 the decrease of individual plant height, number of branch and LA per plant. Salinity  
346 decreases the ability of a plant to take up water by inducing osmotic stress and thereby  
347 reduces photosynthesis rate as a consequence of reduction of leaf expansion and closes  
348 stomates (Munns, 2005; Rahnama *et al.* 2010; Deinlein *et al.* 2014). Moreover, low biomass  
349 yield with high salinity level may be due to the fact that the high salinity induced oxidative  
350 stress, which damages membrane lipids, proteins and nucleic acids, and ultimately cell death  
351 (PérezLópez *et al.* 2009; Gill and Tuteja 2010; Del-Rio 2015). In our experiment, LA was  
352 reduced drastically at high salinity (NaCl at 120 mM) conditions probably due to the  
353 premature senescence of photosynthetic active leaves as a consequence of Na<sup>+</sup> and Cl<sup>-</sup> ions  
354 toxicity, which ultimately reduced the total dry leaf biomass. It has also been reported that  
355 under salt-stress a specific Cl<sup>-</sup> build-up is observed in the leaves, which triggers 1-  
356 aminocyclopropane-1-carboxylic acid (ACC) synthesis and its conversion to ethylene, and  
357 eventually releases enough quantity of ethylene to hasten leaf abscission (Tudela and Primo-  
358 Millo 1992; Gómez-Cadenas *et al.* 1996, 1998; Dodd 2005).

359 The reduction of dry leaf biomass in the present experiment at high salinity stress (NaCl at  
360 120 mM) can be due to the fact that the presence of higher concentration of NaCl in soils  
361 reduces the uptake of potassium (K<sup>+</sup>), calcium (Ca<sup>2+</sup>), and nitrogen (**Fig 2a,e,g**). Restrictions  
362 of N assimilation in plant body due to reduction of activity of cytosolic NADH nitrate  
363 reductase enzyme in nitrate assimilation pathway have been reported under salinity stress  
364 (Sivasankar and Oaks 1996; Jabeen and Ahmad 2011).

365 In the present study, the yield attributes and dry leaf biomass production of *S. Rebaudiana*  
366 plants did not show any reduction at mild salinity level (40 mM NaCl) rather to some extent  
367 increased compared with control (plants irrigated with non-saline water). These results could  
368 be due to the fact that Na<sup>+</sup> played important role as a functional nutrient or monovalent cation  
369 in some physiological and metabolic activities and eventually hastened yield attributes of  
370 stevia. The functional role Na<sup>+</sup> in the stomatal physiology of some plants has already been  
371 reported by Evans and Sorger (1966). Moreover, Cl<sup>-</sup> accumulation in stevia plants at low  
372 salinity level (40 mM NaCl) may be the suitable amount for functioning in stomatal  
373 regulation and osmoregulation.

374 On the other hand, the rate of increase of dry leaf and stem yield with KNO<sub>3</sub> at 5.0 g L<sup>-1</sup>  
375 might be due to the availability of adequate amount of K<sup>+</sup> and its counter ion NO<sub>3</sub><sup>-</sup> for

376 different biological activities like photosynthesis rate and RuBP carboxylase activity  
377 (Ramanujan and Rao 1971; Parasar and Dastane 1973; Jabeen and Ahmad 2011). Other  
378 probable explanation is higher accumulation of N in leaf, stem and root, which ultimately  
379 induces cytokinin synthesis in root tips and maintains desirable cytokinin and auxin ratio. The  
380 root cell division and differentiation of root are controlled by cytokinin and auxin ratio (Dello  
381 Ioio *et al.* 2008), and the events of major cell specification during embryogenesis are  
382 controlled by cytokinin and auxin (Muller and Sheen 2008). The positive effects of the N on  
383 yield attributes and yield of stevia plant have also been reported by Pal *et al.* (2013, 2015).

384 The dry leaf yield did not show significant reduction under moderate salinity (NaCl at 80  
385 mM) when KNO<sub>3</sub> at 10.0 g L<sup>-1</sup> was applied compared with absolute control (plant irrigated  
386 with non-saline water and without KNO<sub>3</sub>). This result could be due to fact that exogenous  
387 application of K<sup>+</sup> improved plant water status and maintained ion balance in cytosol,  
388 particularly K: Na and Ca: Na ratio. Higher K: Na ratio was observed with the exogenous  
389 application of K<sup>+</sup> compared with water spray under all the salinity levels. Potassium play a  
390 key role in plant metabolic processes that improve plant water uptake by regulating the  
391 osmotic potential and hydraulic conductivity of membranes under drought or salinity stress  
392 (Heinen *et al.* 2009). Thus, it is evident from our investigation that exogenous application of  
393 K<sup>+</sup> improves salinity tolerance of stevia upto 80 mM NaCl.

394 Reduction of photosynthetic pigments at higher salinity, such as Chl<sub>a</sub>, Chl<sub>b</sub> and total Chl in  
395 this experiment may be due to the accumulations of higher amount of Na<sup>+</sup> and Cl<sup>-</sup> in leaf,  
396 which disrupts the ultra structure of chloroplast and breaks down the Chl. Under salinity  
397 stress conditions, Chl degradation is happened due to enhanced activity of chlorophyllase  
398 enzyme (Santos 2004). However, some researcher has explained that Cl<sup>-</sup> toxicity is the  
399 primary reason for the degradation of chlorophyll in plants (Tavakkoli *et al.* 2010).  
400 Chloroplasts also exhibit high permeability for Cl<sup>-</sup> (Heber and Heldt 1981). On the other  
401 hand, the low ratio of Chl<sub>a</sub>: Chl<sub>b</sub> with NaCl at 40 mM treatment in the present experiment  
402 provides evidence that the photosynthetic pigments are not degraded at mild salinity level.  
403 During the process of Chl degradation, Chl<sub>a</sub> content is increased as a result of conversation  
404 from Chl<sub>b</sub> to Chl<sub>a</sub> (Fang *et al.* 1998; Eckardt 2009). Higher total Chl with KNO<sub>3</sub> at 5.0 g L<sup>-1</sup>  
405 could be due to the fact that right concentration of KNO<sub>3</sub> increased the accumulation of total  
406 N and K<sup>+</sup> in the leaf, and eventually increased the Chl content. K<sup>+</sup> checks the decomposition  
407 of newly formed Chl and δ-aminolevulinic acid (ALA) formation (Tanaka and Tsuji 1980).

408 The organic osmolytes perform the vital role in maintaining low intracellular osmotic  
409 potential of plants and in preventing the detrimental effects of salinity stress (Tarczynski *et*  
410 *al.* 1993; Verslues *et al.* 2006). The utmost value of proline with NaCl at 120 mM could be  
411 due to fact that stevia plant faces the osmotic stress under salinity condition and proline is  
412 produced for osmotic adjustment. However, catabolism of proline is enhanced during  
413 recovery (Szekely *et al.* 2008; Poonlaphdecha *et al.* 2012; Sharma and Verslues 2010), and  
414 during this phase, proline regulates cell proliferation, cell death and expression of stress-  
415 recovery genes (Szabados and Savoure 2010). On the other hand, significantly ( $P \leq 0.05$ )  
416 higher amount of proline was recorded with the foliar application  $\text{KNO}_3$  at 5.0 and 7.5 g L<sup>-1</sup>  
417 compared with water spray in both the years.

418 It is well known fact that oxidative stress is occurred in salinity stress, mostly because of the  
419 generation of excessive ROS (reactive oxygen species) within plant cells. In order to  
420 scavenge or detoxify high ROS levels, plants produce phenolic compounds as an antioxidant  
421 defense system (Gill and Tuteja 2010; Foyer and Noctor 2011; Petridis *et al.* 2012; Chawla *et*  
422 *al.* 2013). Thus, biosynthesis of phenolic compounds is stimulated in salt-exposed plants  
423 (Navarro *et al.* 2006; Bose *et al.* 2014). However, in the present experiment, the total phenols  
424 content in stevia leaves was significantly increased ( $P \leq 0.05$ ) at mild salinity level (NaCl at  
425 40 mM), whereas significant ( $P \leq 0.05$ ) reduction was observed at high salinity level (NaCl at  
426 120 mM) compared with control (**Fig. 2e**). Maximum total phenols content with the foliar  
427 application of moderate concentration of  $\text{KNO}_3$  under low saline (NaCl at 40 mM) conditions  
428 (**Table 4**) may be due to accumulation of higher amount of  $\text{K}^+$  and balanced amount of others  
429 ions present in plant tissues, which are responsible for the accumulation of higher total  
430 phenols content. In the present experiment, higher amount of  $\text{K}^+$  in leaf tissues has been  
431 recorded with these treatment combinations. The growth strengthening antioxidant system in  
432 plants is improved by  $\text{K}^+$  under salinity stress (Zheng *et al.* 2008).

433 Averaged across the  $\text{KNO}_3$  levels, the plants treated with low salinity water (NaCl at 40 mM)  
434 accumulated higher amount of stevioside, Reb-A and TSGs compared with the plants treated  
435 with high salinity (NaCl at 120 mM) water and non-saline water in both the years. The  
436 present results are in conformity with the findings of Zeng *et al.* (2013) and Cantabella *et al.*  
437 (2017). Low SGs accumulation at severe salinity condition may be due to the fact that the  
438 energy is utilized for the process of maintaining metabolic homeostasis. It has been reported  
439 that when plants survive under high salinity stress conditions, energy is allocated for the  
440 synthesis of simple osmolytes and enhancing activities of antioxidant enzymes (Abrol *et al.*



441 2012). The role of SGs as osmoprotectant molecules under stress has already been established  
442 (Geuns and Ceunen 2013). On the other hand, irrespective of salinity levels, higher amounts  
443 of stevioside, Reb-A and TSGs in leaves were recorded with the moderate concentration of  
444  $\text{KNO}_3$ . This result may be due to the fact that exogenous application of  $\text{KNO}_3$  increases the  
445 accumulations of N,  $\text{K}^+$  and  $\text{Ca}^{2+}$  in plant tissues, which help to develop membrane system of  
446 chloroplasts and the content of photosynthetic pigments. Accumulation of steviol glycosides  
447 in the cells of stevia plant is correlated with the development of the membrane system of  
448 chloroplasts and the content of photosynthetic pigments (Ladygin *et al.* 2008). Moreover,  
449 under optimum nutrient availability, carbohydrates are used to increase the amount of SGs  
450 (Barbet-Massin *et al.* 2015).

451 Averaged over  $\text{KNO}_3$  level, concentration of ions particularly N,  $\text{K}^+$  and  $\text{Ca}^{2+}$  and ratio of K:  
452 Na and Ca: Na in plant tissues were drastically reduced at high salinity level (NaCl at 120  
453 mM), whereas reversed trends were observed in case of  $\text{Na}^+$  and  $\text{Cl}^-$ . In the saline soil,  $\text{Na}^+$   
454 ion competes with  $\text{K}^+$  for the transporter, since both have the common transport mechanism  
455 (Sairam and Tyagi, 2004; Munns and Tester 2008) and similar in charge. However, at mild  
456 salinity (NaCl at 40 mM) level,  $\text{K}^+$  content in leaf was higher in plant tissue, which suggested  
457 that stevia could tolerate moderate salinity stress. This result also suggests that stevia plant  
458 has the ability to do selective  $\text{K}^+$  uptake under mild salinity level. Pooled across all salinity  
459 environments, the accumulations of N,  $\text{K}^+$  and  $\text{Ca}^{2+}$  in leaf, stem and root were higher with  
460 the foliar application of  $\text{KNO}_3$  at  $5.0 \text{ gL}^{-1}$ . However,  $\text{K}^+$  accumulation was declined at higher  
461 concentration probably due to the destruction of ectodesmata structures (Marschner 1995).  
462 Moreover,  $\text{K}^+$  accumulation leaf tissue was increased with moderate concentration of  $\text{KNO}_3$   
463 under all the salinity level. This may be due to fact that exogenous application of  $\text{KNO}_3$   
464 increased the  $\text{K}^+$  accumulation to cope the adverse effect of salt stress.

465 Thus, it is concluded from the present investigation that the exogenous foliar application of  
466  $\text{KNO}_3$  can elevate the salinity tolerance level of stevia through ion homeostasis, osmolyte  
467 accumulation, and antioxidant metabolism mechanism.

#### 468 **Supplementary data**

469 Table S1. Correlation coefficient matrix for agronomic traits of stevia

470 Table S2. Nutrients status in soil after harvest as influenced by salinity levels and foliar application of  
471  $\text{KNO}_3$

472 Fig S1. Influence of irrigation water with different concentrations of NaCl on soil pH (a,b), EC (c,d)  
473 and organic carbon (e,f).

474 **Acknowledgments**

475 The authors are grateful to Director of CSIR- IHB, for providing the necessary facilities.

476 We also thank Mr. Ramdeen Prasad for technical support. The authors acknowledge the

477 CSIR, Government of India, for financial support.

## References:

- Abrol E, Vyas D, Koul S.** 2012. Metabolic shift from secondary metabolite production to induction of antioxidative enzymes during NaCl stress in *Swertia chirata* Buch. -Ham. *Acta Physiologia Plantarum* **34**, 541-546.
- Arnon DI.** 1949. Copper enzymes in isolated chloroplasts. Polyphenoloxidase in *Beta vulgaris*. *Plant Physiology* **24**, 1-15.
- Ashraf M, Foolad MR.** 2007. Roles of glycine betaine and proline in improving plant abiotic stress resistance. *Environmental and Experimental Botany* **59**, 206e216.
- Barbet-Massin C, Giuliano S, Alletto L, Daydé J, Berger M.** 2015. Nitrogen limitation alters biomass production but enhances steviol glycoside concentration in *Stevia rebaudiana* Bertoni. *PLoS One* **10(7)**, e0133067.
- Bates LS, Waldren RP, Teare ID.** 1973. Rapid determination of free proline for water stress studies. *Plant soil* **39**, 205-207.
- Bose J, Rodrigo-Moreno A, Shabala S.** 2014. ROS homeostasis in halophytes in the context of salinity stress tolerance. *Journal of Experimental Botany* **65**, 1241-1257.
- Cantabella D, Piqueras A, Acosta-Motos JR, Bernal-Vicente A, Hernandez JA, Diaz-Vivancos P.** 2017. Salt-tolerance mechanisms induced in *Stevia rebaudiana* Bertoni: Effects of mineral nutrition, antioxidative metabolism and steviol glycoside content. *Plant Physiology and Biochemistry* **115**, 484-496.
- Chawla S, Jain S, Jain V.** 2013. Salinity induced oxidative stress and antioxidant system in salt-tolerant and salt-sensitive cultivars of rice (*Oryza sativa* L.). *Journal of Plant Biochemistry and Biotechnology* **22**, 27-34.
- Cornillon P, Palloix A.** 1997. Influence of sodium chloride on the growth and mineral nutrition of pepper cultivars. *Journal of Plant Nutrition* **20**, 1085-1094.
- Deinlein U, Stephan AB, Horie T, Luo W, Xu G, Schroeder JI.** 2014. Plant salt tolerance mechanisms. *Trends in Plant Science* **19**, 371e379.
- Del Rio LA.** 2015. ROS and RNS in plant physiology: an overview. *Journal of Experimental Botany* **66 (10)**, 2827-2837.
- Dodd IC.** 2005. Root-to-shoot signalling: Assessing the roles of 'up' in the up and down world of long-distance signalling in planta. *Plant Soil* **74**, 257-275.
- Eckardt NA.** 2009. A new chlorophyll degradation pathway. *Plant Cell* **21**, 700.
- Evans HJ, Sorger G.J.** 1966. Role of mineral elements with emphasis on the univalent cations. *Annual Review of Plant Physiology* **17**, 47-76.

- Fageria NK, Filho MPB, Moreira A, Guimares CM.** 2009. Foliar fertilization of crop plants. *Journal of Plant Nutrition* **32**, 1044-1064.
- Fang Z, Bouwkamp J, Solomos T.** 1998. Chlorophyllase activities and chlorophyll degradation during leaf senescence in nonyellowing mutant and wild type of *Phaseolus vulgaris* L. *Journal of Experimental Botany* **49**, 503-510.
- FAO.** 2008. Land and Plant Nutrition Management Service. <http://www.fao.org/ag/agl/agll/spush>.
- Foyer CH, Noctor G.** 2011. Ascorbate and glutathione: the heart of the redox hub. *Plant Physiology* **155**, 2-18.
- Geuns JMC, Ceunen S.** 2013. Steviol glycosides: chemical diversity, metabolism, and function. *Journal of Natural Products* **76**, 1201e1228.
- Gill SS, Tuteja N.** 2010. Reactive oxygen species and antioxidant machinery in abiotic stress tolerance in crop plants. *Plant Physiology and Biochemistry* **48**, 909-930.
- Gómez-Cadenas A, Tadeo FR, Talon M, Primo-Millo E.** 1996. Leaf abscission induced by ethylene in water stressed intact seedlings of Cleopatra mandarin requires previous abscisic acid accumulation in roots. *Plant Physiology* **112**, 401-408.
- Gómez-Cadenas A, Tadeo FR, Primo-Millo E, Talon M.** 1998. Involvement of abscisic acid and ethylene in the response of citrus seedlings to salt shock. *Physiologia Plantarum* **103**, 475-484.
- Halperin ST, Gilroy S, Lynch JP.** 2003. Sodium chloride reduces growth and cytosolic calcium, but does not affect cytosolic pH, in root hairs of *Arabidopsis thaliana* L. *Journal of Experimental Botany* **54**, 1269-1280.
- Heber U, Heldt HW.** 1981. The chloroplast envelope: Structure, function, and role in leaf metabolism. *Annual review of plant physiology* **32**, 132-168.
- Heinen RB, Ye Q, Chaumont F.** 2009. Role of aquaporins in leaf physiology. *Journal of Experimental Botany* **60(11)**, 2971e2985.
- Husband AD, Godden W.** 1927. Determination of sodium, potassium and chlorine in foodstuffs. *Analyst* **52**, 72.
- Dello Ioio R, Nakamura K, Moubayidin L, et al.** 2008. A genetic framework for the control of cell division and differentiation in the root meristem. *Science* **332**, 380-1384.
- Izzo R, Navari-Izzo F, Quartacci MF.** 1991. Growth and mineral absorption in maize seedlings as affected by increasing NaCl concentrations. *Journal of Plant Nutrition* **14**, 687-699.

- Jabeen N, Ahmad R.** 2011. Foliar application of potassium nitrate affects the growth and nitrate reductase activity in sunflower and safflower leaves under salinity. *Notulae Botanicae Horti Agrobotanici Cluj* **39(2)**, 172-178.
- James RA, Blake C, Byrt S, Munns R.** 2011. Major genes for Na<sup>+</sup> exclusion, Nax1 and Nax2 (wheat HKT1;4 and HKT1;5), decrease Na<sup>+</sup> accumulation in bread wheat leaves under saline and waterlogged conditions. *Journal of Experimental botany* **62(8)**, 2939-2947.
- Kinghorn AD.** 2001. Stevia: The genus Stevia. pp. 1-202. Taylor & Francis Inc. New York, USA.
- Ladygin VG, Bondarev NI, Semenova GA, Smolov AA, Reshetnyak OV, Nosov AM.** 2008. Chloroplast ultrastructure, photosynthetic apparatus activities and production of steviol glycosides in *Stevia rebaudiana* in vivo and in vitro. *Biologia Plantarum* **52(1)**, 9-16.
- Li L, Kim BG, Cheong YH, Pandey GK, Luan S.** 2006. A Ca<sup>2+</sup> signaling pathway regulates a K<sup>+</sup> channel for low-K response in Arabidopsis. *Proceedings of the National Academy of the Sciences, U. S. A* **103**, 12625-12630.
- Marschner H.** 1995. Mineral nutrition of higher plants. *Annals of Botany* **78**, 527-528.
- Muller B, Sheen J.** 2008. Cytokinin and auxin interactions in root stem-cell specification during early embryogenesis. *Nature* **453**, 1094-8.
- Munns R, Tester M.** 2008. Mechanisms of Salinity Tolerance. *Annual Review of Plant Biology* **59**, 651-681.
- Munns R.** 2002. Comparative physiology of salt and water stress. *Plant, Cell and Environment* **25(2)**, 239-250.
- Munns R.** 2005. Genes and salt tolerance: bringing them together. *New Phytologist* **167(3)**, 645-63.
- Navarro JM, Flores P, Garrido C, Martinez V.** 2006. Changes in the contents of antioxidant compounds in pepper fruits at ripening stages, as affected by salinity. *Food Chemistry* **96**, 66-73.
- Niu X, Bressan RA, Hasegawa PM, Pardo JM.** 1995. Ion homeostasis in NaCl stress environments. *Plant Physiology* **109(3)**, 735-742.
- Pal PK, Mahajan M.** 2017. Tillage system and organic mulch influence leaf biomass, steviol glycoside yield and soil health under sub-temperate conditions. *Industrial Crops and Products* **104**, 33-44.

- Pal PK, Kumar R, Guleria V, et al.** 2015a. Crop-ecology and nutritional variability influence growth and secondary metabolites of *Stevia rebaudiana* Bertoni. *BMC Plant Biology* **15**, 67.
- Pal PK, Prasad R, Pathania V.** 2013. Effect of decapitation and nutrient applications on shoot branching, yield, and accumulation of secondary metabolites in leaves of *Stevia rebaudiana* Bertoni. *Journal of Plant Physiology* **170**, 1526-1535.
- Parasar KS, Dastane NG.** 1973. Studies on the effects of soil moisture regimes, plant population and nitrogen fertilization on the yield and quality of sugarbeet. *Indian Journal of Agricultural Sciences* **28**, 516-520.
- Perez-Alfocea F, Balibrea ME, Santa Cruz A, Estan MT.** 1996 Agronomical and physiological characterization of salinity tolerance in a commercial tomato hybrid. *Plant and soil* **180**, 251-257.
- Perez-lopez U, Robredo A, Lacuesta M, Sgherri C, Muñoz-Rueda A, Navari-Izzo F, Mena-Petite A.** 2009. The oxidative stress caused by salinity in two barley cultivars is mitigated by elevated CO<sub>2</sub>. *Physiologia Plantarum* **135**, 29-42.
- Petridis A, Therios I, Samouris G, Tananaki C.** 2012. Salinity-induced changes in phenolic compounds in leaves and roots of four olive cultivars (*Olea europaea* L.) and their relationship to antioxidant activity. *Environmental and Experimental Botany* **79**, 37-43
- Poonlaphdecha J, Maraval L, Roques S, Audebert A, Boulanger R, Bry X, Gunata Z.** 2012. Effect of timing and duration of salt treatment during growth of a fragrant rice on variety on yield and 2- acetyl-1- pyrroline, proline, and GABA levels. *Journal of Agricultural and Food Chemistry* **60**, 3824-3830.
- Prasad R, Shivay YS, Kumar D, Sharma SN.** 2006. Learning by doing exercise in soil fertility-a practical manual for soil fertility, Division of agronomy. New Delhi: IARI.
- Rahnama A, James RA, Poustini K, Munns R.** 2010. Stomatal conductance as a screen for osmotic stress tolerance in durum wheat growing in saline soil. *Functional Plant Biology* **37(3)**, 255-263.
- Ramanujan T, Rao JS.** 1971. Photosynthesis and dry matter production by rice plant growth under different levels of nitrogen. *Madras Agricultural Journal* **58**, 38-40
- Sairam RK, Tyagi A.** 2004. Physiology and molecular biology of salinity stress tolerance in plants. *Current Science* **86(3)**, 407- 421.

- Santos CV.** 2004. Regulation of chlorophyll biosynthesis and degradation by salt stress in sunflower leaves Among the amino acids, proline is the main effector in this response. *Scientia Horticulturae* **103**, 93-99.
- Schroeder JI, Delhaize E, Frommer WB, et al.** 2013. Using membrane transporters to improve crops for sustainable food production. *Nature* **497**, 60-66
- Sharma S, Verslues PE.** 2010. Mechanisms independent of abscisic acid (ABA) or proline feedback have a predominant role in transcriptional regulation of proline metabolism during low water potential and stress recovery. *Plant Cell and Environment* **33**, 1838-1851.
- Sivasankar S, Oaks A.** 1996. Nitrate assimilation in higher plants: The effect of metabolites. *Plant Physiology and Biochemistry* **34**, 609-620.
- Subbarao GV, Johansen C, Jana MK, Kumar Rao JVDK.** 1990. Effects of the sodium/calcium ratio in modifying salinity response of pigeon pea (*Cajanus cajan*). *Journal of plant physiology* **136**, 339-443.
- Szabados L, Savoure A.** 2010. Proline: a multifunctional amino acid. *Trends in Plant Science* **15**, 89-97.
- Szekely G, Abraham E, Cseplo A, et al.** 2008. Duplicated *P5CS* genes of Arabidopsis play distinct roles in stress regulation and developmental control of proline biosynthesis. *Plant Journal* **53**, 11-28.
- Tanaka A, Tsuji H.** 1980. Effects of calcium on chlorophyll synthesis and stability in the early phase of greening in cucumber cotyledons. *Plant Physiology* **65**, 1211-5.
- Tarczynski MC, Jensen RG, Bohnert HG.** 1993. Stress protection of transgenic tobacco by production of the osmolyte mannitol. *Science* **259**, 508-510.
- Tavakkoli E, Fatehi F, Coventry S, Rengasamy P, McDonald GK.** 2011. Additive effects of Na<sup>+</sup> and Cl<sup>-</sup> ions on barley growth under salinity stress. *Journal of Experimental Botany* **62(6)**, 2189-203.
- Tavakkoli E, Rengasamy PSR, McDonald GK.** 2010. High concentrations of Na<sup>+</sup> and Cl<sup>-</sup> ions in soil solution have simultaneous detrimental effects on growth of faba bean under salinity stress. *Journal of Experimental Botany* **61(15)**, 4449-4459.
- Tudela D, Primo-Millo E.** 1992. l-Aminocyclopropane-1-carboxylic acid transported from roots to shoots promotes leaf abscission in *Cleopatra mandarin* (*Citrus reshni* Hort. ex Tan.) seedlings rehydrated after water stress. *Plant Physiology* **100**, 131-137.

**Verslues PE, Agarwal M, Katiyar-Agarwal S, Zhu J, Zhu JK.** 2006. Methods and concepts in quantifying resistance to drought, salt and freezing, abiotic stresses that affect plant water status. *Plant Journal* **45**, 523-539.

**WHO.** India. Available at: <http://www.searo.who.int/india/mediacentre/events/2016/en/>. Accessed on 4 My 2019.

**Zeng J, Chen A, Dandan L, Bin Y, Wei W.** 2013. Effects of salt stress on the growth, physiological responses, and glycoside contents of *Stevia rebaudiana* Bertoni. *Journal of Agricultural and Food Chemistry* **61**, 5720-5726.

**Zheng Y, Jia A, Ning T, Xu J, Li Z, Jiang G.** 2008. Potassium nitrate application alleviates sodium chloride stress in winter wheat cultivars differing in salt tolerance. *Journal of Plant Physiology* **165(14)**, 1455e1465.



## Figure legends

**Fig.1.** Variation in biochemical parameters i.e. (a) chlorophyll a, (b) chlorophyll b, (c) total chlorophyll, (d) chl a/ chl b, (e) total phenols and (f) proline in stevia leaves under different salinity and KNO<sub>3</sub> levels. S<sub>0</sub>, S<sub>1</sub>, S<sub>2</sub>, and S<sub>3</sub> are representing salinity level (NaCl) of 0.0, 40, 80 and 120 mM, respectively, whereas as K<sub>0</sub>, K<sub>1</sub>, K<sub>2</sub>, K<sub>3</sub>, K<sub>4</sub> are representing the folia application of KNO<sub>3</sub> at 0.0, 2.5, 5.0, 7.5, and 10.0 g L<sup>-1</sup>, respectively. Vertical bars represented the mean standard errors (±).

**Fig. 2.** Effects of salinity level and exogenous application of KNO<sub>3</sub> on accumulation of total nitrogen (a, b) phosphorus (c, d), potassium (e, f), and calcium (g, h), in the leaf, stem and root of *Stevia rebaudiana*. S<sub>0</sub>, S<sub>1</sub>, S<sub>2</sub>, and S<sub>3</sub> represents as control, NaCl at 40, 80, and 120 mM, respectively. K<sub>0</sub>, K<sub>1</sub>, K<sub>2</sub>, K<sub>3</sub>, K<sub>4</sub> are representing the folia application of KNO<sub>3</sub> at 0.0, 2.5, 5.0, 7.5, and 10.0 g L<sup>-1</sup>, respectively. The mean standard errors (±) are presented with vertical bars.

**Fig. 3.** Effects of salinity level and exogenous application of KNO<sub>3</sub> on accumulation of sodium (a, b) chlorine (c, d), K: Na (e, f), and Ca: Na (g, h), in the leaf, stem and root of *Stevia rebaudiana*. S<sub>0</sub>, S<sub>1</sub>, S<sub>2</sub>, and S<sub>3</sub> represents as control, NaCl at 40, 80, and 120 mM, respectively. K<sub>0</sub>, K<sub>1</sub>, K<sub>2</sub>, K<sub>3</sub>, K<sub>4</sub> are representing the foliar application of KNO<sub>3</sub> at 0.0, 2.5, 5.0, 7.5, and 10.0 g L<sup>-1</sup>, respectively. The mean standard errors (±) are presented with vertical bars.

**Fig. 4.** Steviol glycosides accumulation (mg g<sup>-1</sup>) in leaf as influenced by salinity level and folia application of KNO<sub>3</sub> (a, b). Steviol glycosides yield are represented in g plant<sup>-1</sup> (c,d). S<sub>0</sub>, S<sub>1</sub>, S<sub>2</sub>, and S<sub>3</sub> are representing salinity level (NaCl) of 0.0, 40, 80 and 120 mM, respectively, whereas as K<sub>0</sub>, K<sub>1</sub>, K<sub>2</sub>, K<sub>3</sub>, K<sub>4</sub> are representing the folia application of KNO<sub>3</sub> at 0.0, 2.5, 5.0, 7.5, and 10.0 g L<sup>-1</sup>, respectively. The mean standard errors (±) are presented with vertical bars.

**Fig. 5.** Regression equation between dry leaf yield and salinity level (a). Another regression equation between dry leaf yield and concentration of KNO<sub>3</sub> (b).

**Fig. 6.** The multivariate analyses of agronomic traits (plant height, branch, leaf area, dry leaf, stem and root yield) and biochemical parameters [total chlorophyll (T-chl), total phenols (TP), proline (PL), N, P, K, Ca, Na, Cl, K: Na, Ca: Na] were conducted through Principal Component analysis (PCA). The first two factors (PC<sub>1</sub> and PC<sub>2</sub>) mutually explained 80.32%

and 80.07 % of the total variations for the 1<sup>st</sup> and 2<sup>nd</sup> year, respectively (**Fig. 6a-d**). The PCA bi-plots (**Fig. 6b and 6d**) represent the distributions of treatment combinations. The proline (PL), Na and Cl were placed in the positive coordinate of PC<sub>1</sub> in 1<sup>st</sup> year (**Fig. 6a**) with loading values of 0.82, 0.78 and 0.77, respectively. Similarly, in second cropping season PL, Na, Ca and Cl were also separated by the PC<sub>1</sub> from rest of the agronomic traits and biochemical parameters, and placed in the positive coordinate of PC<sub>1</sub> and PC<sub>2</sub> (**Fig. 6c**). The PCA bi-plot (**Fig. 6b**) separated the treatments S<sub>2</sub>K<sub>4</sub> (NaCl at 80 mM with the foliar application of KNO<sub>3</sub> at 10.0 g L<sup>-1</sup>) and S<sub>3</sub>K<sub>4</sub> (NaCl at 120 mM with foliar application of KNO<sub>3</sub> at 10.0 g L<sup>-1</sup>) by PC<sub>1</sub> and PC<sub>2</sub>, and placed in the positive coordinate of both PCs for 1<sup>st</sup> season. However, no distinct group was formed in the PCA bi-plot (**Fig. 6d**) for 2<sup>nd</sup> season.

**Fig. 7.** Principal Component analysis of secondary metabolites and biochemical traits. PC<sub>1</sub> and PC<sub>2</sub> jointly explains 61.62% and 60.77% of the total initial variability of the data in the 1<sup>st</sup> (a, b) and 2<sup>nd</sup> (c, d) cropping years, respectively (**Fig. 7 a-d**). During 1st year Reb-F, Reb-C, proline, Na<sup>+</sup> and Cl<sup>-</sup> were separated from rest of variables by the PC<sub>1</sub> and placed in negative coordinate (**Fig. 7a**). However, the PCA bi-plot (**Fig. 7b**) did not categorize the treatment combinations in any define clusters. Only S<sub>0</sub>K<sub>1</sub> (irrigation with normal water X foliar application of KNO<sub>3</sub> at 2.5 g L<sup>-1</sup>) was separated by PC<sub>1</sub> and PC<sub>2</sub>, and situated in the positive coordinate of both PCs. Like 1st cropping season, Reb-F, Reb-C, proline, Na and Cl were again separated by the PC<sub>1</sub> and placed in the negative coordinate (**Fig. 7c**) for 2<sup>nd</sup> year. It was also revealed that the loading values three variables such as proline, Na and Cl were quite high with PC<sub>1</sub>. However, PCA bi-plot (**Fig. 7d**) separated the treatment combinations into two broad distinct clusters by PC<sub>1</sub>. Non-salinity (control) and low salinity (NaCl at 40 mM) treatments in combination with all foliar spray treatments (total 10 treatment combinations) were separated by PC<sub>1</sub> and placed in positive coordinate (**Fig. 7d**). In this group, two treatment combinations namely S<sub>1</sub>K<sub>2</sub> (NaCl at 40 mM X KNO<sub>3</sub> at 5.0 g L<sup>-1</sup>) and S<sub>1</sub>K<sub>3</sub> (NaCl at 40 mM x KNO<sub>3</sub> at 7.5 g L<sup>-1</sup>) were further separated from rest of the treatment combinations by both PCs, and placed in positive coordinate of both PCs.

Table 1. Physico-chemical properties of the experimental soil

| Parameters                                   | Year   |        |
|----------------------------------------------|--------|--------|
|                                              | 2016   | 2017   |
| Sand (%)                                     | 42.4   | 42.7   |
| Silt (%)                                     | 42.7   | 38.0   |
| Clay (%)                                     | 17.3   | 19.3   |
| Texture                                      | Loam   | Loam   |
| Bulk density ( $\text{g cm}^{-3}$ )          | 1.25   | 1.17   |
| pH (1:2)                                     | 6.72   | 6.31   |
| EC <sub>25</sub> (1:2)( $\text{ds.m}^{-1}$ ) | 0.11   | 0.10   |
| OC (%)                                       | 1.53   | 1.66   |
| N ( $\text{mg kg}^{-1}$ )                    | 64.87  | 122.73 |
| P ( $\text{mg kg}^{-1}$ )                    | 14.96  | 13.21  |
| K <sup>+</sup> ( $\text{mg kg}^{-1}$ )       | 272.80 | 284.30 |
| Ca <sup>2+</sup> ( $\text{mg kg}^{-1}$ )     | 925.00 | 939.80 |
| Na <sup>+</sup> ( $\text{mg kg}^{-1}$ )      | 36.80  | 42.00  |
| Cl <sup>-</sup> ( $\text{mg kg}^{-1}$ )      | 3.54   | 3.12   |

Table 2. Effect of salinity and foliar application of KNO<sub>3</sub> on yield attributes of *Stevia rebaudiana*

| Salinity level (NaCl)          | Concentration of KNO <sub>3</sub>        | Plant height (cm) |       | Total branch (No. plant <sup>-1</sup> ) |      | Leaf area (cm <sup>2</sup> plant <sup>-1</sup> ) |        | Specific leaf weight (mg cm <sup>-2</sup> ) |       |
|--------------------------------|------------------------------------------|-------------------|-------|-----------------------------------------|------|--------------------------------------------------|--------|---------------------------------------------|-------|
|                                |                                          | 2016              | 2017  | 2016                                    | 2017 | 2016                                             | 2017   | 2016                                        | 2017  |
| Control (S <sub>0</sub> )      | Control (K <sub>0</sub> )                | 66.00             | 63.33 | 6.67                                    | 7.33 | 355.36                                           | 350.64 | 15.42                                       | 15.20 |
|                                | 2.5 g L <sup>-1</sup> (K <sub>1</sub> )  | 74.13             | 69.33 | 7.33                                    | 8.33 | 396.56                                           | 393.51 | 15.31                                       | 15.21 |
|                                | 5.0 g L <sup>-1</sup> (K <sub>2</sub> )  | 74.30             | 71.67 | 7.67                                    | 8.33 | 460.97                                           | 467.04 | 15.26                                       | 15.36 |
|                                | 7.5 g L <sup>-1</sup> (K <sub>3</sub> )  | 66.57             | 65.00 | 7.33                                    | 7.67 | 388.20                                           | 359.12 | 15.44                                       | 15.09 |
|                                | 10.0 g L <sup>-1</sup> (K <sub>4</sub> ) | 63.30             | 62.00 | 6.67                                    | 6.67 | 325.05                                           | 312.85 | 14.31                                       | 13.93 |
|                                | Average                                  | 68.86             | 66.27 | 7.13                                    | 7.67 | 385.83                                           | 376.63 | 15.15                                       | 14.96 |
| 40 mM (S <sub>1</sub> )        | Control (K <sub>0</sub> )                | 65.20             | 60.67 | 7.00                                    | 7.33 | 357.11                                           | 341.10 | 15.45                                       | 15.52 |
|                                | 2.5 g L <sup>-1</sup> (K <sub>1</sub> )  | 76.80             | 73.67 | 7.67                                    | 8.67 | 367.12                                           | 418.45 | 16.97                                       | 15.75 |
|                                | 5.0 g L <sup>-1</sup> (K <sub>2</sub> )  | 77.13             | 77.00 | 8.33                                    | 8.67 | 428.09                                           | 488.98 | 16.52                                       | 15.23 |
|                                | 7.5 g L <sup>-1</sup> (K <sub>3</sub> )  | 68.37             | 64.67 | 7.00                                    | 8.00 | 440.02                                           | 367.36 | 13.81                                       | 15.21 |
|                                | 10.0 g L <sup>-1</sup> (K <sub>4</sub> ) | 63.57             | 62.67 | 6.67                                    | 6.67 | 372.92                                           | 331.35 | 14.04                                       | 14.34 |
|                                | Average                                  | 70.21             | 67.73 | 7.33                                    | 7.87 | 393.05                                           | 389.45 | 15.36                                       | 15.21 |
| 80 mM (S <sub>2</sub> )        | Control (K <sub>0</sub> )                | 57.03             | 55.33 | 5.33                                    | 4.67 | 268.22                                           | 271.29 | 14.90                                       | 14.97 |
|                                | 2.5 g L <sup>-1</sup> (K <sub>1</sub> )  | 63.33             | 59.67 | 6.33                                    | 6.00 | 328.79                                           | 313.63 | 13.96                                       | 13.43 |
|                                | 5.0 g L <sup>-1</sup> (K <sub>2</sub> )  | 63.93             | 61.33 | 7.00                                    | 6.67 | 344.77                                           | 339.18 | 14.24                                       | 14.35 |
|                                | 7.5 g L <sup>-1</sup> (K <sub>3</sub> )  | 64.17             | 62.33 | 7.33                                    | 7.00 | 347.81                                           | 325.74 | 14.27                                       | 15.43 |
|                                | 10.0 g L <sup>-1</sup> (K <sub>4</sub> ) | 64.30             | 62.67 | 6.00                                    | 7.00 | 306.87                                           | 311.54 | 16.42                                       | 16.19 |
|                                | Average                                  | 62.55             | 60.27 | 6.40                                    | 6.27 | 319.29                                           | 312.27 | 14.76                                       | 14.88 |
| 120 mM (S <sub>3</sub> )       | Control (K <sub>0</sub> )                | 54.93             | 52.33 | 4.67                                    | 4.33 | 251.04                                           | 240.17 | 15.26                                       | 14.87 |
|                                | 2.5 g L <sup>-1</sup> (K <sub>1</sub> )  | 58.23             | 57.00 | 5.33                                    | 5.33 | 324.03                                           | 307.94 | 13.81                                       | 13.66 |
|                                | 5.0 g L <sup>-1</sup> (K <sub>2</sub> )  | 65.33             | 60.33 | 5.67                                    | 5.67 | 329.86                                           | 335.44 | 14.53                                       | 14.37 |
|                                | 7.5 g L <sup>-1</sup> (K <sub>3</sub> )  | 65.57             | 62.00 | 6.00                                    | 6.00 | 321.34                                           | 321.67 | 15.13                                       | 15.39 |
|                                | 10.0 g L <sup>-1</sup> (K <sub>4</sub> ) | 62.83             | 58.00 | 5.33                                    | 5.00 | 297.36                                           | 284.54 | 14.46                                       | 14.86 |
|                                | Average                                  | 61.38             | 57.93 | 5.40                                    | 5.27 | 304.72                                           | 297.95 | 14.64                                       | 14.63 |
| Averages across salinity level | Control (K <sub>0</sub> )                | 60.79             | 57.92 | 5.92                                    | 5.92 | 307.93                                           | 300.80 | 15.26                                       | 15.14 |
|                                | 2.5 g L <sup>-1</sup> (K <sub>1</sub> )  | 68.13             | 64.92 | 6.67                                    | 7.08 | 354.13                                           | 358.38 | 15.01                                       | 14.51 |
|                                | 5.0 g L <sup>-1</sup> (K <sub>2</sub> )  | 70.18             | 67.58 | 7.17                                    | 7.33 | 390.92                                           | 407.66 | 15.14                                       | 14.83 |
|                                | 7.5 g L <sup>-1</sup> (K <sub>3</sub> )  | 66.17             | 63.50 | 6.92                                    | 7.17 | 374.34                                           | 343.47 | 14.66                                       | 15.28 |
|                                | 10.0 g L <sup>-1</sup> (K <sub>4</sub> ) | 63.50             | 61.33 | 6.17                                    | 6.33 | 325.55                                           | 310.07 | 14.81                                       | 14.83 |
| SEm ± (NaCl)                   |                                          | 1.29              | 1.12  | 0.27                                    | 0.33 | 4.11                                             | 3.99   | 0.35                                        | 0.45  |
| LSD (P=0.5), NaCl              |                                          | 3.70              | 3.20  | 0.78                                    | 0.93 | 11.79                                            | 11.45  | NS                                          | NS    |
| SEm ± (KNO <sub>3</sub> )      |                                          | 1.44              | 1.25  | 0.30                                    | 0.36 | 4.60                                             | 4.46   | 0.39                                        | 0.50  |
| LSD (P=0.5), KNO <sub>3</sub>  |                                          | 4.14              | 3.58  | 0.87                                    | 1.04 | 13.19                                            | 12.81  | NS                                          | NS    |
| SEm ± (S × K)                  |                                          | 2.89              | 2.49  | 0.61                                    | 0.73 | 9.19                                             | 8.93   | 0.78                                        | 1.00  |
| LSD (P=0.5), S × K             |                                          | NS                | NS    | NS                                      | NS   | 26.37                                            | 25.61  | NS                                          | NS    |

Table 3. Effect of salinity levels and foliar application of KNO<sub>3</sub> on dry leaf yield, dry stem yield and dry root biomass of *Stevia rebaudiana*

| Salinity level (NaCl)          | Concentration of KNO <sub>3</sub>        | Dry leaf yield (g plant <sup>-1</sup> ) |      | Dry stem yield (g plant <sup>-1</sup> ) |      | Dry root biomass (g plant <sup>-1</sup> ) |      |
|--------------------------------|------------------------------------------|-----------------------------------------|------|-----------------------------------------|------|-------------------------------------------|------|
|                                |                                          | 2016                                    | 2017 | 2016                                    | 2017 | 2016                                      | 2017 |
| Control (S <sub>0</sub> )      | Control (K <sub>0</sub> )                | 5.47                                    | 5.33 | 6.35                                    | 5.82 | 1.84                                      | 2.05 |
|                                | 2.5 g L <sup>-1</sup> (K <sub>1</sub> )  | 6.07                                    | 5.99 | 6.67                                    | 6.90 | 1.87                                      | 2.10 |
|                                | 5.0 g L <sup>-1</sup> (K <sub>2</sub> )  | 7.02                                    | 7.18 | 7.36                                    | 8.21 | 2.15                                      | 2.38 |
|                                | 7.5 g L <sup>-1</sup> (K <sub>3</sub> )  | 5.99                                    | 5.39 | 6.96                                    | 6.58 | 2.06                                      | 2.09 |
|                                | 10.0 g L <sup>-1</sup> (K <sub>4</sub> ) | 4.66                                    | 4.37 | 5.67                                    | 5.21 | 1.64                                      | 1.51 |
|                                | Average                                  | 5.84                                    | 5.65 | 6.60                                    | 6.54 | 1.91                                      | 2.02 |
| 40 mM (S <sub>1</sub> )        | Control (K <sub>0</sub> )                | 5.50                                    | 5.30 | 6.23                                    | 5.72 | 1.72                                      | 1.77 |
|                                | 2.5 g L <sup>-1</sup> (K <sub>1</sub> )  | 6.21                                    | 6.55 | 7.29                                    | 7.65 | 2.16                                      | 2.41 |
|                                | 5.0 g L <sup>-1</sup> (K <sub>2</sub> )  | 7.07                                    | 7.45 | 7.89                                    | 8.64 | 2.46                                      | 2.61 |
|                                | 7.5 g L <sup>-1</sup> (K <sub>3</sub> )  | 6.09                                    | 5.57 | 6.95                                    | 6.76 | 1.84                                      | 2.03 |
|                                | 10.0 g L <sup>-1</sup> (K <sub>4</sub> ) | 5.24                                    | 4.75 | 6.73                                    | 5.58 | 1.51                                      | 1.36 |
|                                | Average                                  | 6.02                                    | 5.93 | 7.02                                    | 6.87 | 1.94                                      | 2.03 |
| 80 mM (S <sub>2</sub> )        | Control (K <sub>0</sub> )                | 4.01                                    | 4.06 | 4.99                                    | 4.83 | 1.20                                      | 1.14 |
|                                | 2.5 g L <sup>-1</sup> (K <sub>1</sub> )  | 4.59                                    | 4.22 | 5.84                                    | 5.36 | 1.39                                      | 1.22 |
|                                | 5.0 g L <sup>-1</sup> (K <sub>2</sub> )  | 4.92                                    | 4.86 | 6.38                                    | 6.15 | 1.66                                      | 1.61 |
|                                | 7.5 g L <sup>-1</sup> (K <sub>3</sub> )  | 4.96                                    | 5.01 | 6.44                                    | 6.35 | 1.96                                      | 2.08 |
|                                | 10.0 g L <sup>-1</sup> (K <sub>4</sub> ) | 5.02                                    | 5.05 | 5.50                                    | 5.77 | 1.99                                      | 2.09 |
|                                | Average                                  | 4.70                                    | 4.64 | 5.83                                    | 5.69 | 1.64                                      | 1.63 |
| 120 mM (S <sub>3</sub> )       | Control (K <sub>0</sub> )                | 3.83                                    | 3.57 | 4.75                                    | 4.22 | 1.09                                      | 1.09 |
|                                | 2.5 g L <sup>-1</sup> (K <sub>1</sub> )  | 4.48                                    | 4.21 | 5.11                                    | 4.76 | 1.32                                      | 1.25 |
|                                | 5.0 g L <sup>-1</sup> (K <sub>2</sub> )  | 4.79                                    | 4.81 | 5.63                                    | 5.65 | 1.49                                      | 1.29 |
|                                | 7.5 g L <sup>-1</sup> (K <sub>3</sub> )  | 4.86                                    | 4.95 | 5.70                                    | 5.73 | 1.62                                      | 1.69 |
|                                | 10.0 g L <sup>-1</sup> (K <sub>4</sub> ) | 4.31                                    | 4.21 | 4.75                                    | 4.56 | 1.08                                      | 1.11 |
|                                | Average                                  | 4.45                                    | 4.35 | 5.19                                    | 4.98 | 1.32                                      | 1.29 |
| Averages across salinity level | Control (K <sub>0</sub> )                | 4.70                                    | 4.57 | 5.58                                    | 5.15 | 1.46                                      | 1.51 |
|                                | 2.5 g L <sup>-1</sup> (K <sub>1</sub> )  | 5.34                                    | 5.24 | 6.23                                    | 6.17 | 1.69                                      | 1.74 |
|                                | 5.0 g L <sup>-1</sup> (K <sub>2</sub> )  | 5.95                                    | 6.08 | 6.81                                    | 7.16 | 1.94                                      | 1.97 |
|                                | 7.5 g L <sup>-1</sup> (K <sub>3</sub> )  | 5.48                                    | 5.23 | 6.51                                    | 6.35 | 1.87                                      | 1.97 |
|                                | 10.0 g L <sup>-1</sup> (K <sub>4</sub> ) | 4.81                                    | 4.60 | 5.66                                    | 5.28 | 1.56                                      | 1.52 |
| SEm ± (NaCl)                   |                                          | 0.13                                    | 0.15 | 0.08                                    | 0.13 | 0.06                                      | 0.08 |
| LSD (P=0.5), NaCl              |                                          | 0.37                                    | 0.42 | 0.24                                    | 0.38 | 0.18                                      | 0.24 |
| SEm ± (KNO <sub>3</sub> )      |                                          | 0.14                                    | 0.17 | 0.09                                    | 0.15 | 0.07                                      | 0.09 |
| LSD (P=0.5), KNO <sub>3</sub>  |                                          | 0.41                                    | 0.47 | 0.27                                    | 0.43 | 0.21                                      | 0.26 |
| SEm ± (S × K)                  |                                          | 0.29                                    | 0.33 | 0.19                                    | 0.30 | 0.15                                      | 0.18 |
| LSD (P=0.5), S × K             |                                          | 0.82                                    | 0.95 | 0.53                                    | 0.86 | 0.41                                      | 0.53 |

Table 4. Interaction effects between salinity level and application of KNO<sub>3</sub> on biochemical parameters and nutrient accumulation in leaf of *Stevia rebaudiana*

| Salinity levels (NaCl)    | Concentration of KNO <sub>3</sub>        | Biochemical parameters          |      |                               |        |                                     |       | Ion accumulation in leaf              |      |                                      |       |
|---------------------------|------------------------------------------|---------------------------------|------|-------------------------------|--------|-------------------------------------|-------|---------------------------------------|------|--------------------------------------|-------|
|                           |                                          | Total Chl (mg g <sup>-1</sup> ) |      | Proline (μg g <sup>-1</sup> ) |        | Total Phenols (mg g <sup>-1</sup> ) |       | Na <sup>+</sup> (mg g <sup>-1</sup> ) |      | K <sup>+</sup> (mg g <sup>-1</sup> ) |       |
|                           |                                          | 2016                            | 2017 | 2016                          | 2017   | 2016                                | 2017  | 2016                                  | 2017 | 2016                                 | 2017  |
| Control (S <sub>0</sub> ) | Control (K <sub>0</sub> )                | 2.73                            | 2.94 | 23.48                         | 29.07  | 32.25                               | 28.79 | 1.30                                  | 1.00 | 22.32                                | 22.80 |
|                           | 2.5 g L <sup>-1</sup> (K <sub>1</sub> )  | 2.90                            | 2.97 | 26.57                         | 29.30  | 39.58                               | 33.92 | 1.13                                  | 1.05 | 23.05                                | 24.20 |
|                           | 5.0 g L <sup>-1</sup> (K <sub>2</sub> )  | 2.93                            | 3.12 | 27.90                         | 30.89  | 46.21                               | 35.00 | 1.07                                  | 1.00 | 25.23                                | 25.57 |
|                           | 7.5 g L <sup>-1</sup> (K <sub>3</sub> )  | 2.64                            | 2.83 | 36.48                         | 29.15  | 29.88                               | 29.83 | 0.90                                  | 0.92 | 23.53                                | 24.40 |
| 40 mM (S <sub>1</sub> )   | 10.0 g L <sup>-1</sup> (K <sub>4</sub> ) | 2.48                            | 2.51 | 49.29                         | 28.99  | 25.50                               | 29.38 | 0.68                                  | 0.92 | 21.33                                | 23.32 |
|                           | Control (K <sub>0</sub> )                | 2.81                            | 2.69 | 36.10                         | 38.26  | 38.04                               | 28.13 | 1.57                                  | 1.32 | 23.92                                | 23.28 |
|                           | 2.5 g L <sup>-1</sup> (K <sub>1</sub> )  | 2.89                            | 2.83 | 34.14                         | 36.98  | 42.42                               | 31.38 | 1.15                                  | 1.07 | 24.62                                | 25.02 |
|                           | 5.0 g L <sup>-1</sup> (K <sub>2</sub> )  | 2.79                            | 2.87 | 35.10                         | 39.26  | 68.17                               | 43.38 | 1.15                                  | 1.02 | 26.63                                | 26.98 |
|                           | 7.5 g L <sup>-1</sup> (K <sub>3</sub> )  | 2.63                            | 2.91 | 37.52                         | 41.32  | 41.21                               | 54.04 | 1.03                                  | 0.93 | 24.85                                | 25.62 |
| 80 mM (S <sub>2</sub> )   | 10.0 g L <sup>-1</sup> (K <sub>4</sub> ) | 1.83                            | 2.72 | 45.14                         | 41.63  | 17.83                               | 28.42 | 0.85                                  | 0.95 | 21.97                                | 22.83 |
|                           | Control (K <sub>0</sub> )                | 1.94                            | 1.66 | 122.90                        | 111.38 | 39.50                               | 37.63 | 1.62                                  | 1.48 | 16.22                                | 16.20 |
|                           | 2.5 g L <sup>-1</sup> (K <sub>1</sub> )  | 2.12                            | 1.70 | 164.10                        | 113.47 | 40.21                               | 35.38 | 1.52                                  | 1.28 | 17.98                                | 18.45 |
|                           | 5.0 g L <sup>-1</sup> (K <sub>2</sub> )  | 2.43                            | 2.06 | 165.10                        | 111.36 | 45.79                               | 36.79 | 1.23                                  | 1.17 | 18.67                                | 19.08 |
|                           | 7.5 g L <sup>-1</sup> (K <sub>3</sub> )  | 2.15                            | 2.28 | 198.33                        | 136.78 | 37.08                               | 35.96 | 1.50                                  | 1.10 | 18.67                                | 19.77 |
| 120 mM (S <sub>3</sub> )  | 10.0 g L <sup>-1</sup> (K <sub>4</sub> ) | 1.33                            | 1.36 | 118.43                        | 106.47 | 24.38                               | 18.54 | 0.97                                  | 1.05 | 18.05                                | 19.65 |
|                           | Control (K <sub>0</sub> )                | 1.49                            | 1.55 | 177.76                        | 127.79 | 32.00                               | 21.33 | 2.07                                  | 1.62 | 15.50                                | 12.53 |
|                           | 2.5 g L <sup>-1</sup> (K <sub>1</sub> )  | 1.74                            | 1.66 | 150.00                        | 133.45 | 33.29                               | 20.75 | 1.55                                  | 1.37 | 14.43                                | 15.18 |
|                           | 5.0 g L <sup>-1</sup> (K <sub>2</sub> )  | 1.92                            | 2.08 | 174.81                        | 155.27 | 33.00                               | 24.17 | 1.35                                  | 1.30 | 16.77                                | 16.50 |
|                           | 7.5 g L <sup>-1</sup> (K <sub>3</sub> )  | 1.79                            | 2.12 | 203.16                        | 146.32 | 31.92                               | 25.58 | 1.22                                  | 1.23 | 15.07                                | 15.98 |
|                           | 10.0 g L <sup>-1</sup> (K <sub>4</sub> ) | 1.32                            | 1.16 | 122.33                        | 112.56 | 22.29                               | 19.83 | 0.95                                  | 1.20 | 13.17                                | 13.48 |
|                           | SEm± for (S× K)                          | 0.09                            | 0.11 | 6.75                          | 5.46   | 3.02                                | 2.88  | 0.07                                  | 0.04 | 0.33                                 | 0.48  |
|                           | CD (P=0.5)                               | 0.26                            | 0.32 | 19.36                         | 15.67  | 8.66                                | 8.25  | 0.19                                  | 0.12 | 0.95                                 | 1.39  |

Table 5. The interaction effects between salinity levels and foliar application of KNO<sub>3</sub> on secondary metabolites profile in *Stevia rebaudiana*

| Salinity Level (NaCl)     | Concentration of KNO <sub>3</sub>        | Stevioside (mg g <sup>-1</sup> ) |       | Rebaudioside-A (mg g <sup>-1</sup> ) |       | TSGs (mg g <sup>-1</sup> ) |        | TSGs yield (g plant <sup>-1</sup> ) |      |
|---------------------------|------------------------------------------|----------------------------------|-------|--------------------------------------|-------|----------------------------|--------|-------------------------------------|------|
|                           |                                          | 2016                             | 2017  | 2016                                 | 2017  | 2016                       | 2017   | 2016                                | 2017 |
| Control (S <sub>0</sub> ) | Control (K <sub>0</sub> )                | 30.15                            | 31.14 | 15.39                                | 21.07 | 70.11                      | 71.83  | 0.37                                | 0.38 |
|                           | 2.5 g L <sup>-1</sup> (K <sub>1</sub> )  | 32.63                            | 41.37 | 43.33                                | 22.37 | 109.40                     | 85.40  | 0.66                                | 0.52 |
|                           | 5.0 g L <sup>-1</sup> (K <sub>2</sub> )  | 62.85                            | 43.72 | 22.55                                | 26.37 | 102.74                     | 86.43  | 0.73                                | 0.62 |
|                           | 7.5 g L <sup>-1</sup> (K <sub>3</sub> )  | 60.32                            | 29.16 | 17.23                                | 19.66 | 85.71                      | 63.15  | 0.51                                | 0.34 |
|                           | 10.0 g L <sup>-1</sup> (K <sub>4</sub> ) | 47.75                            | 34.34 | 10.29                                | 21.56 | 82.56                      | 68.68  | 0.39                                | 0.30 |
| 40 mM (S <sub>1</sub> )   | Control (K <sub>0</sub> )                | 48.39                            | 35.25 | 30.50                                | 22.18 | 89.26                      | 79.11  | 0.49                                | 0.42 |
|                           | 2.5 g L <sup>-1</sup> (K <sub>1</sub> )  | 67.08                            | 37.97 | 20.19                                | 17.94 | 93.91                      | 68.41  | 0.58                                | 0.45 |
|                           | 5.0 g L <sup>-1</sup> (K <sub>2</sub> )  | 36.34                            | 44.89 | 29.15                                | 33.02 | 80.44                      | 112.12 | 0.57                                | 0.84 |
|                           | 7.5 g L <sup>-1</sup> (K <sub>3</sub> )  | 37.91                            | 48.53 | 23.21                                | 22.61 | 70.65                      | 86.77  | 0.43                                | 0.48 |
|                           | 10.0 g L <sup>-1</sup> (K <sub>4</sub> ) | 52.43                            | 30.10 | 10.61                                | 25.84 | 84.79                      | 71.95  | 0.44                                | 0.34 |
| 80 mM (S <sub>2</sub> )   | Control (K <sub>0</sub> )                | 38.21                            | 35.51 | 17.50                                | 18.45 | 65.56                      | 66.05  | 0.26                                | 0.27 |
|                           | 2.5 g L <sup>-1</sup> (K <sub>1</sub> )  | 38.54                            | 34.72 | 22.08                                | 17.71 | 81.00                      | 70.34  | 0.37                                | 0.30 |
|                           | 5.0 g L <sup>-1</sup> (K <sub>2</sub> )  | 27.18                            | 29.23 | 16.56                                | 31.13 | 61.11                      | 78.34  | 0.32                                | 0.38 |
|                           | 7.5 g L <sup>-1</sup> (K <sub>3</sub> )  | 40.12                            | 27.39 | 31.78                                | 29.64 | 82.16                      | 74.35  | 0.41                                | 0.37 |
|                           | 10.0 g L <sup>-1</sup> (K <sub>4</sub> ) | 37.47                            | 27.83 | 14.10                                | 24.77 | 78.55                      | 72.09  | 0.40                                | 0.36 |
| 120 mM (S <sub>3</sub> )  | Control (K <sub>0</sub> )                | 39.42                            | 31.50 | 16.01                                | 22.80 | 65.43                      | 63.71  | 0.25                                | 0.23 |
|                           | 2.5 g L <sup>-1</sup> (K <sub>1</sub> )  | 23.55                            | 34.76 | 9.23                                 | 26.54 | 43.22                      | 74.61  | 0.19                                | 0.31 |
|                           | 5.0 g L <sup>-1</sup> (K <sub>2</sub> )  | 39.84                            | 40.48 | 30.72                                | 8.67  | 98.96                      | 60.09  | 0.48                                | 0.29 |
|                           | 7.5 g L <sup>-1</sup> (K <sub>3</sub> )  | 20.51                            | 21.97 | 8.16                                 | 20.96 | 58.33                      | 62.42  | 0.28                                | 0.31 |
|                           | 10.0 g L <sup>-1</sup> (K <sub>4</sub> ) | 13.93                            | 22.11 | 22.81                                | 12.74 | 54.54                      | 59.35  | 0.24                                | 0.25 |
| SEm± for (S×K)            |                                          | 3.55                             | 3.05  | 2.76                                 | 1.46  | 6.95                       | 3.68   | 0.05                                | 0.03 |
| CD (P=0.5)                |                                          | 10.19                            | 8.76  | 7.91                                 | 4.2   | 19.85                      | 10.57  | 0.13                                | 0.10 |

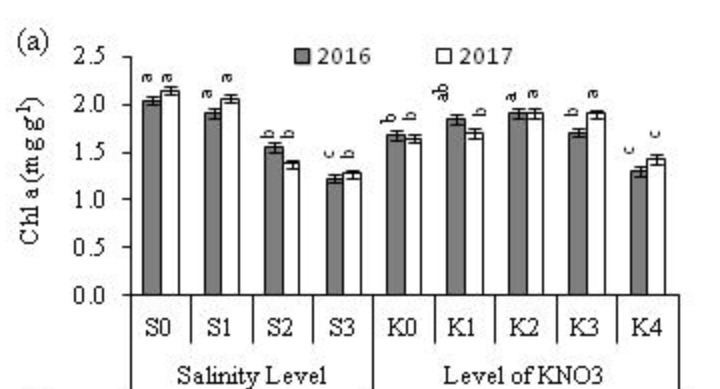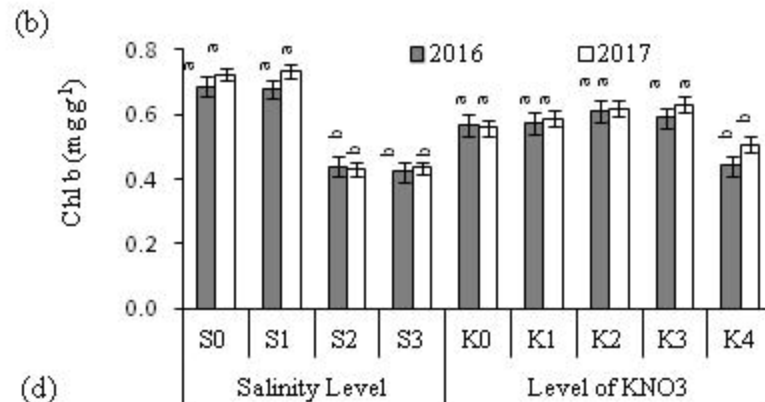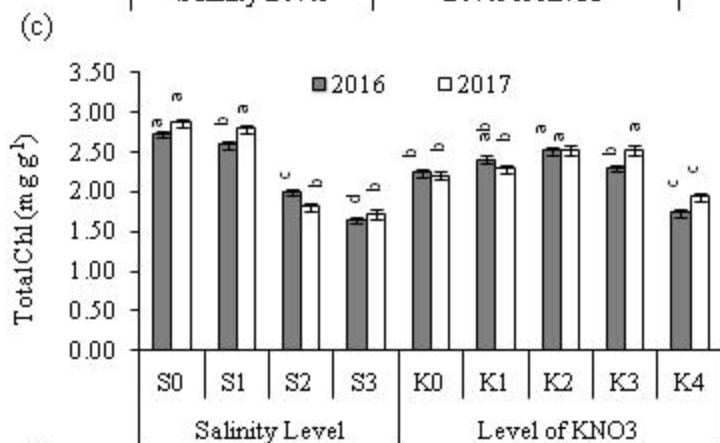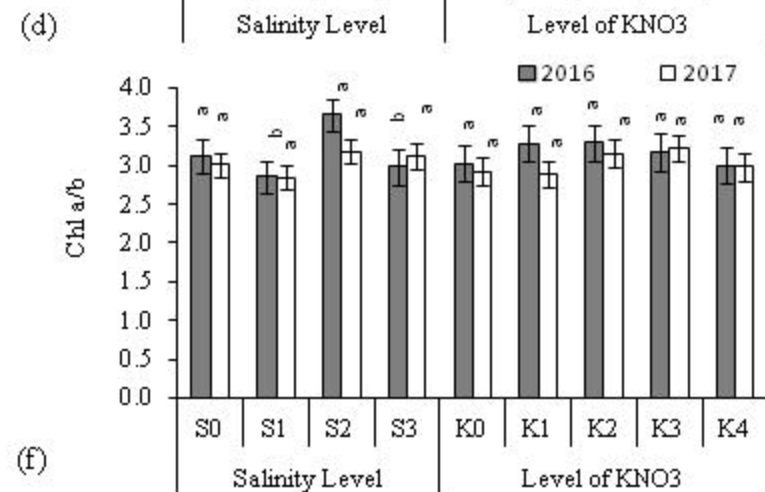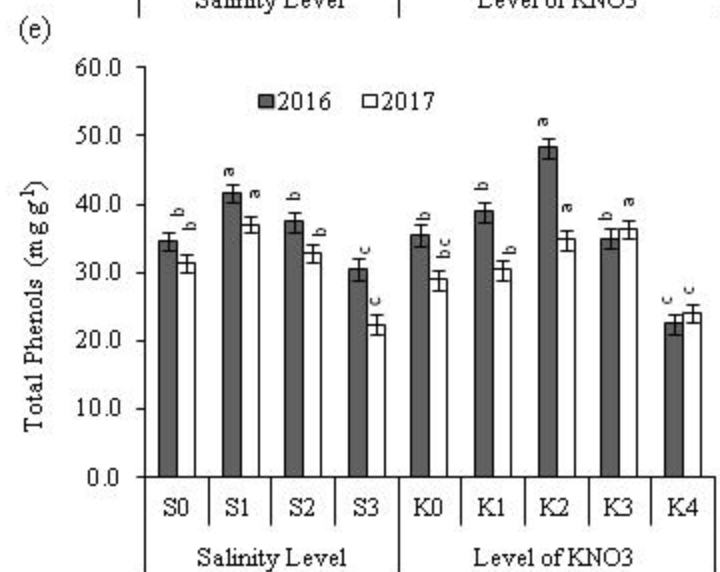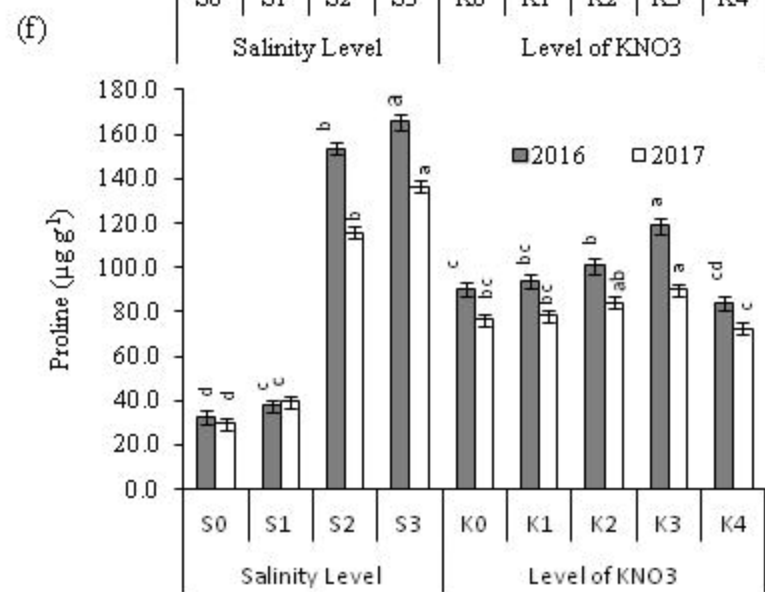



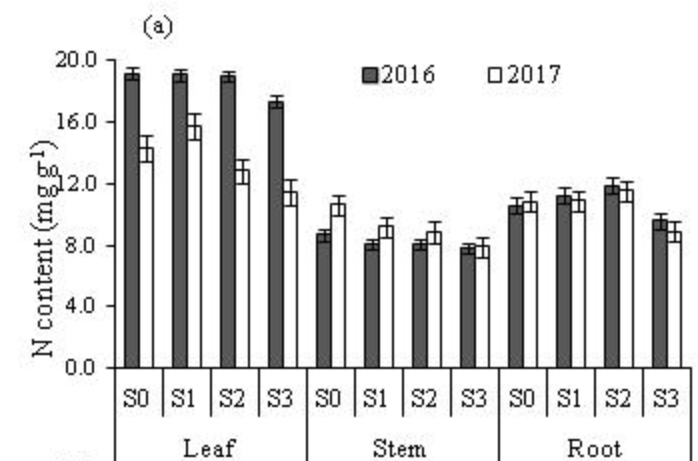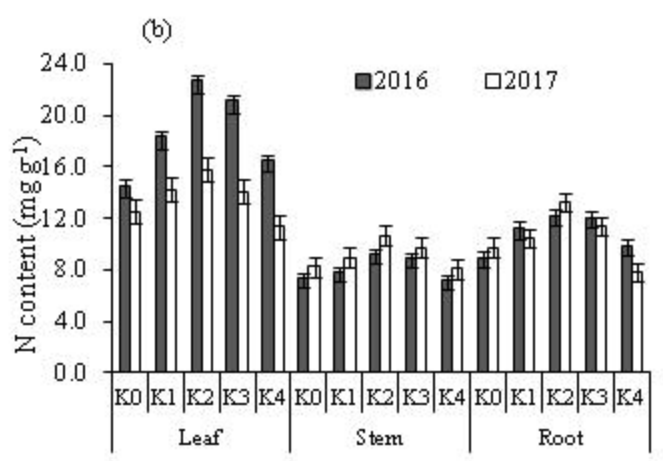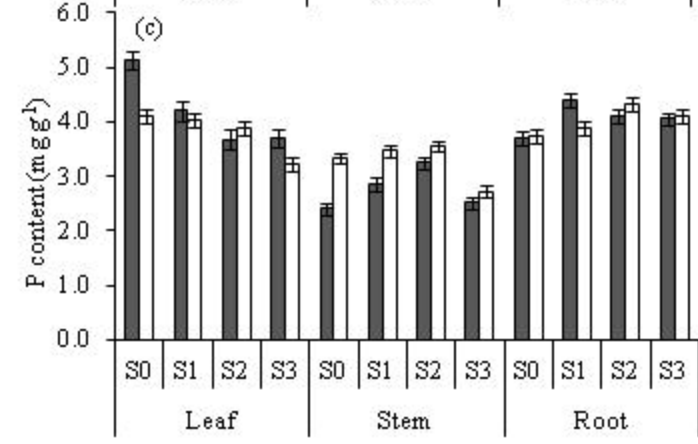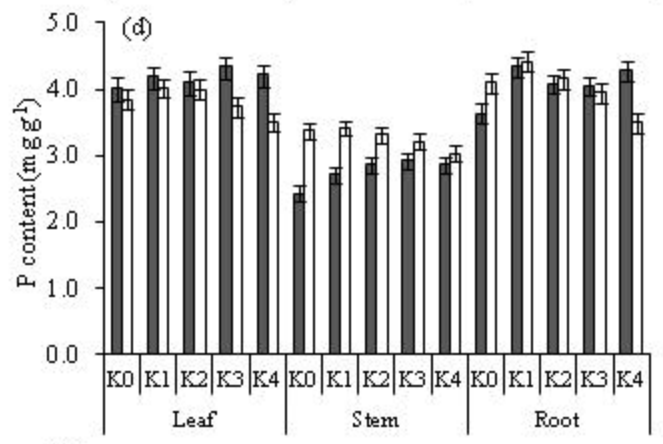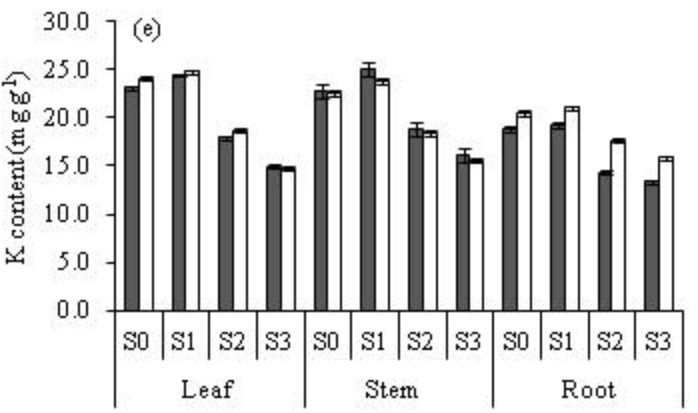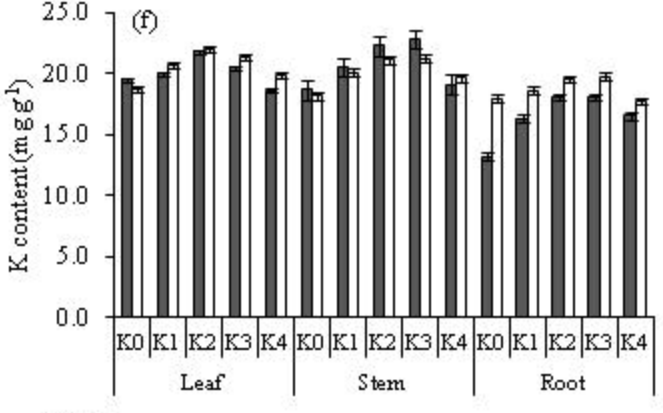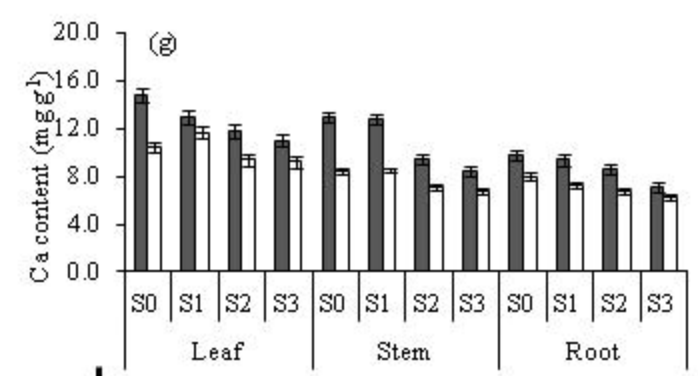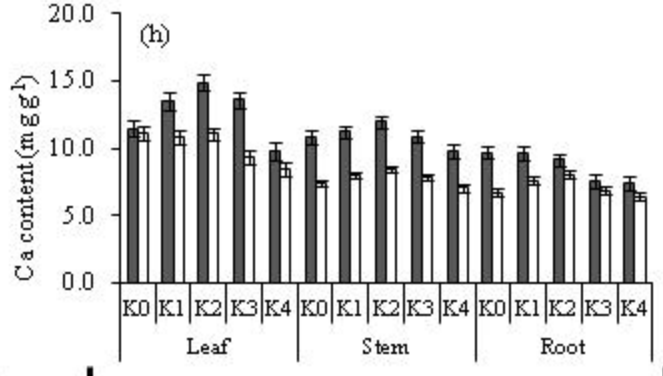

Salinity ( $\text{NaCl}$ ) Level

$\text{KNO}_3$  Level

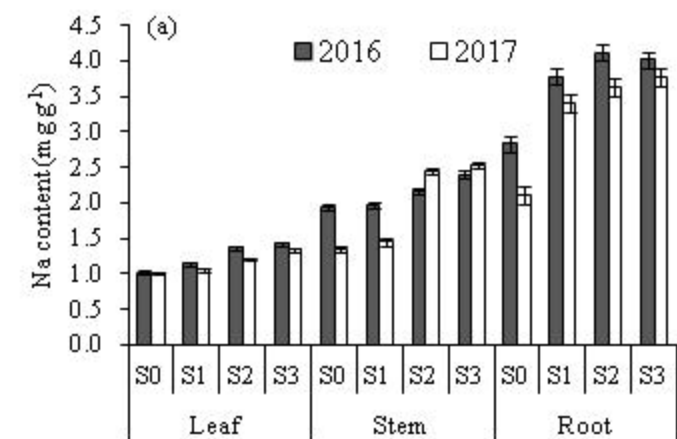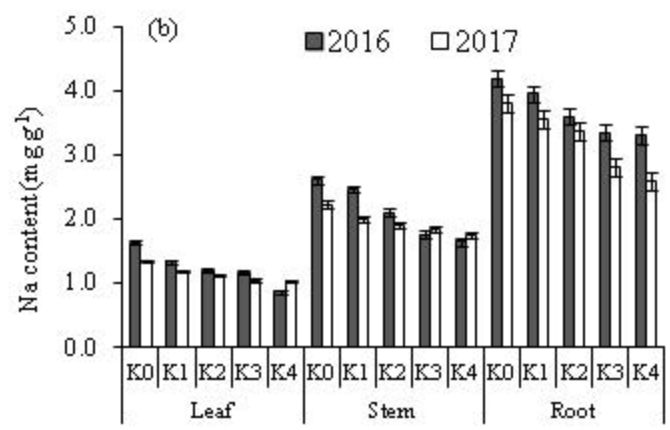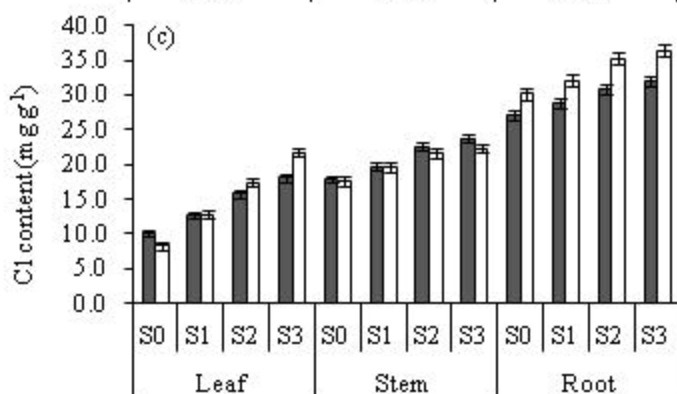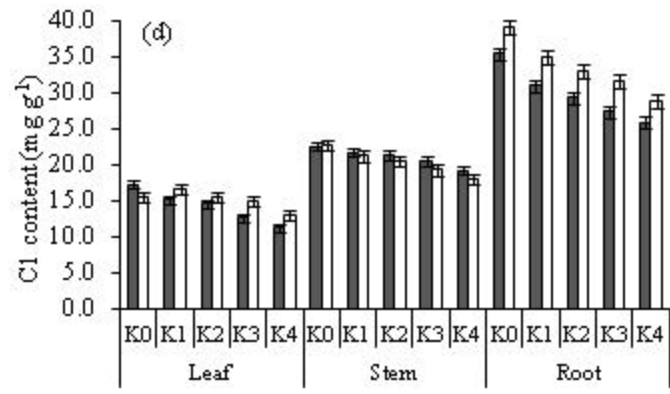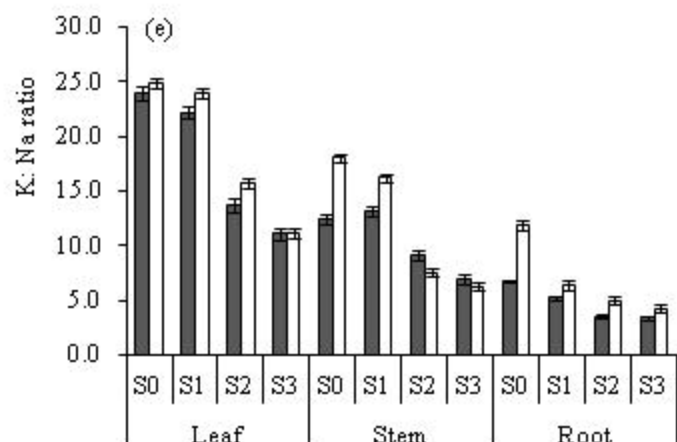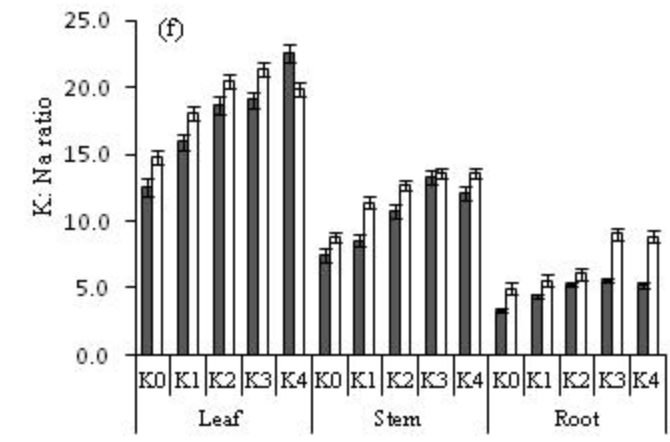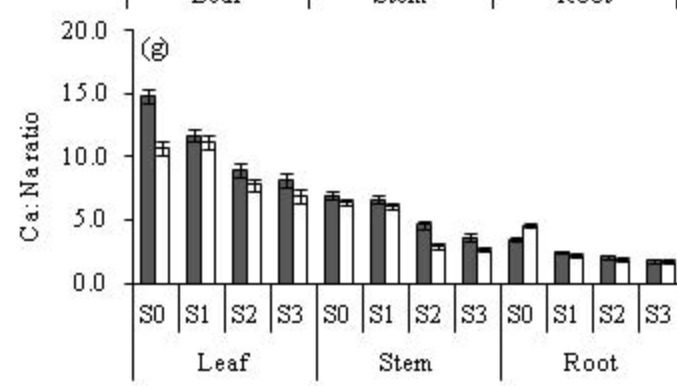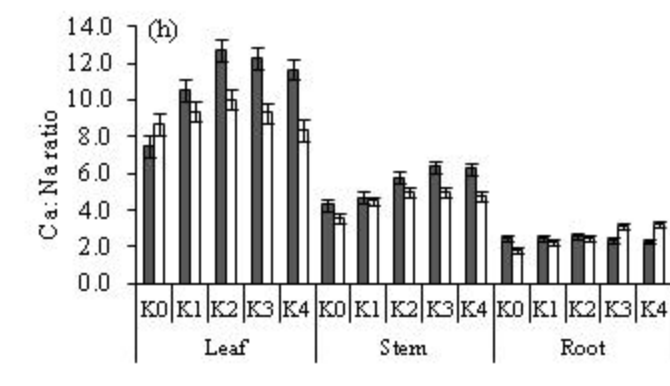

Salinity (NaCl) Level

KNO<sub>3</sub> Level

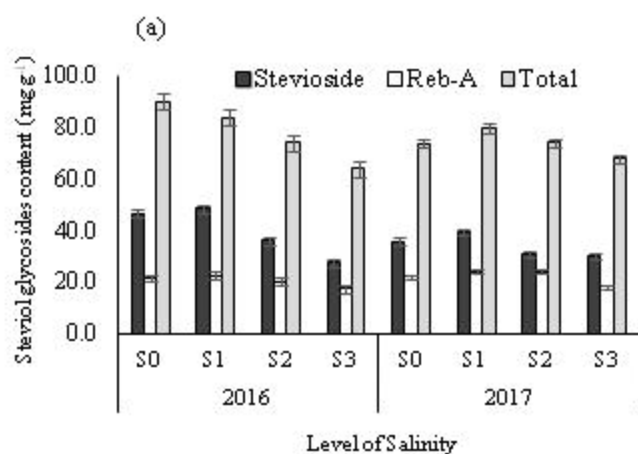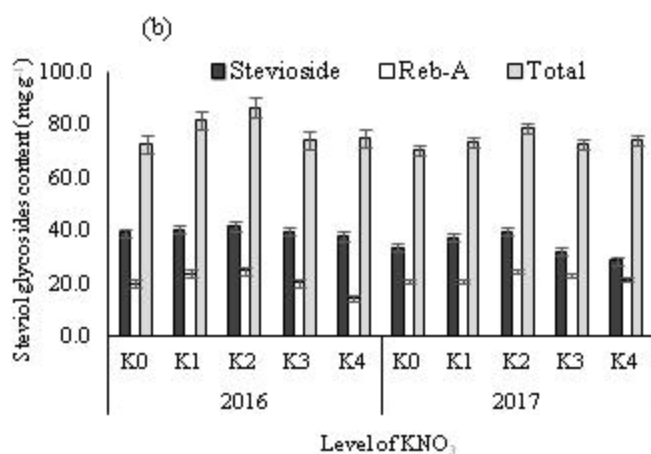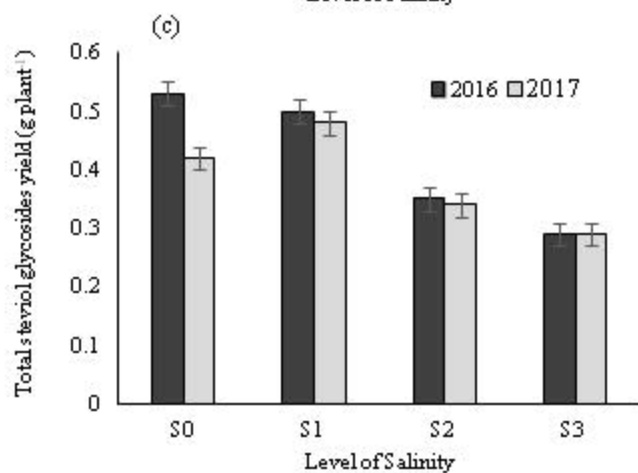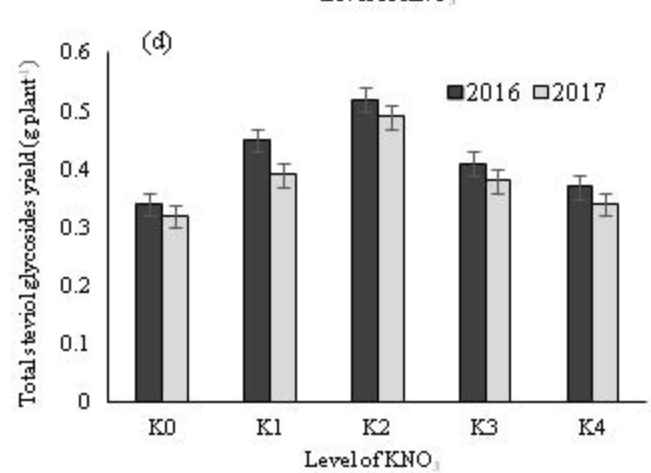

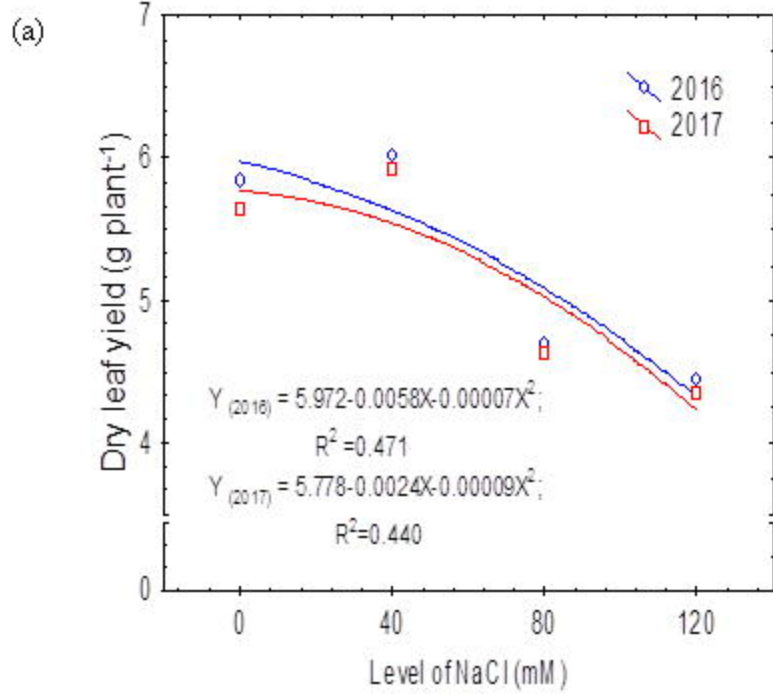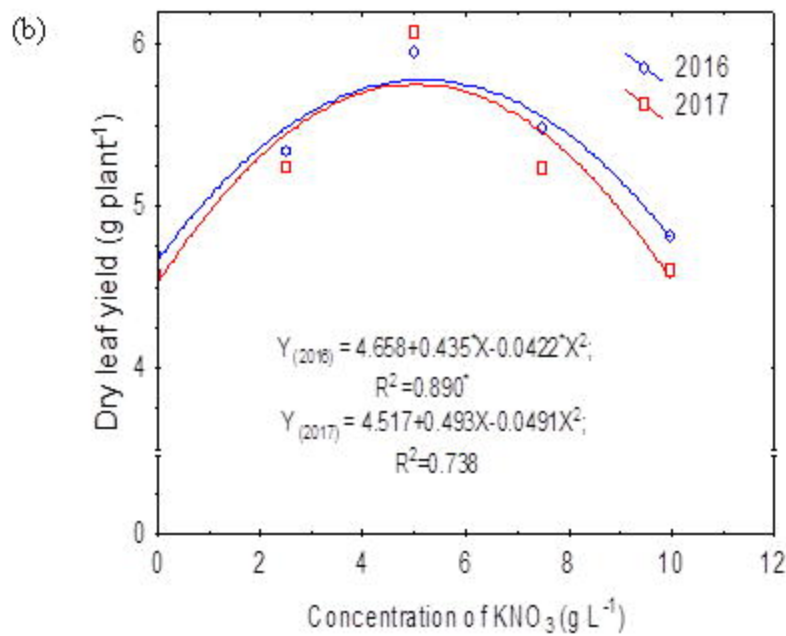

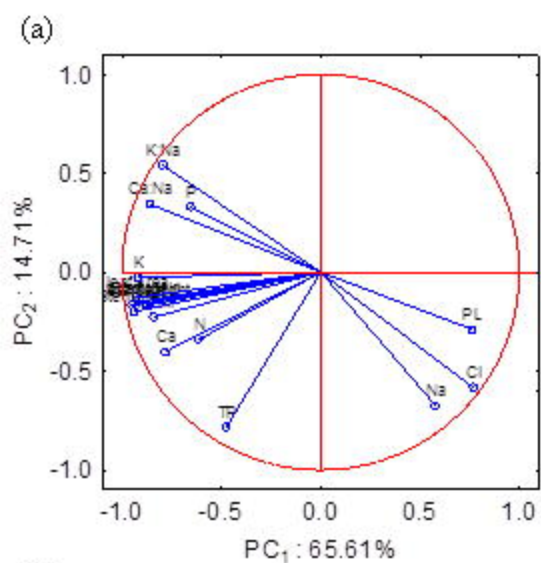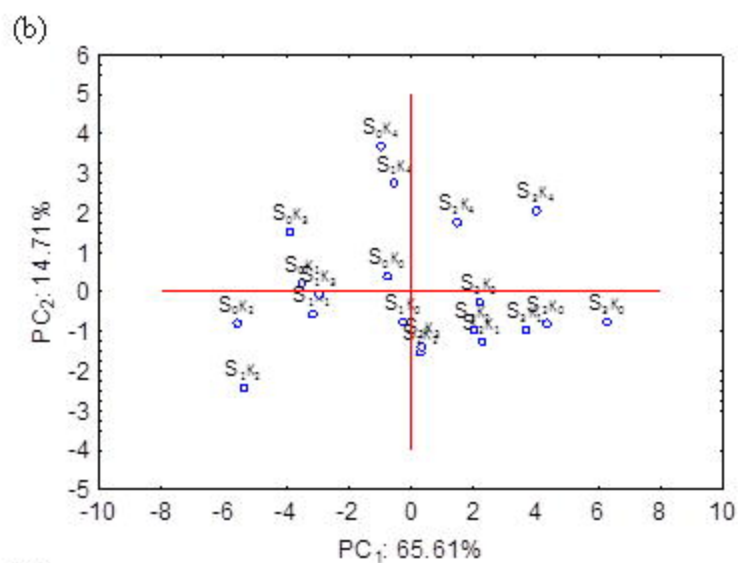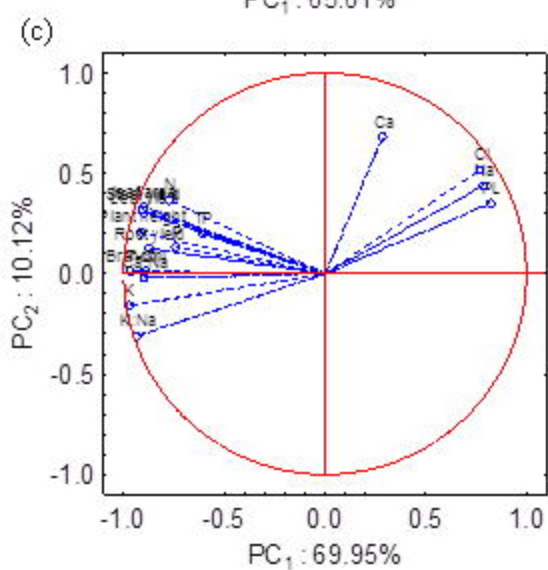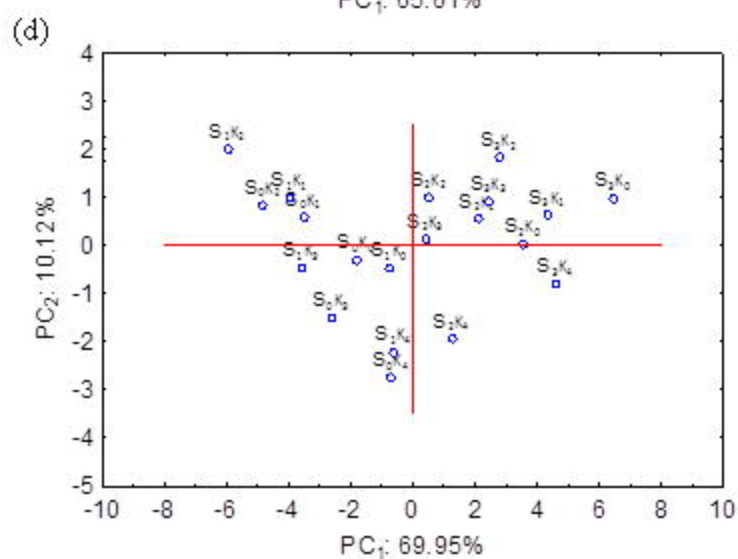

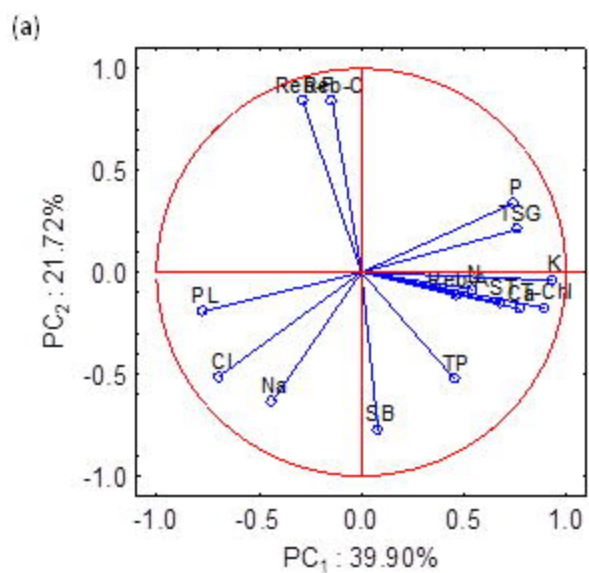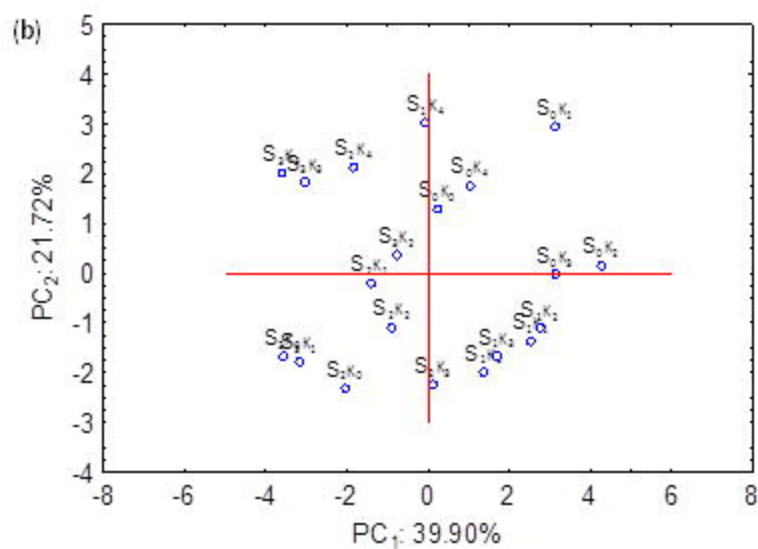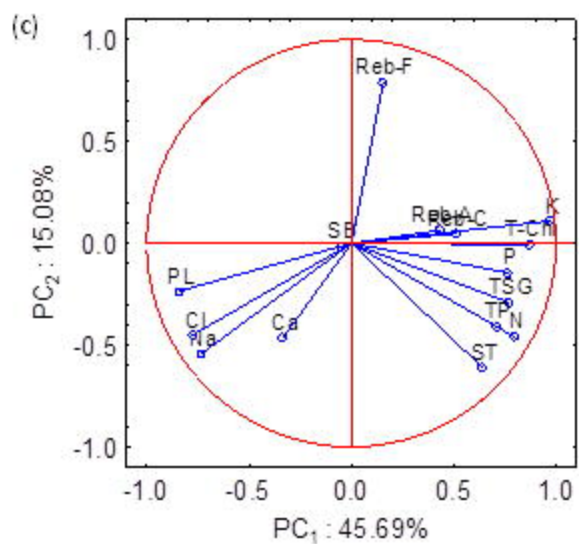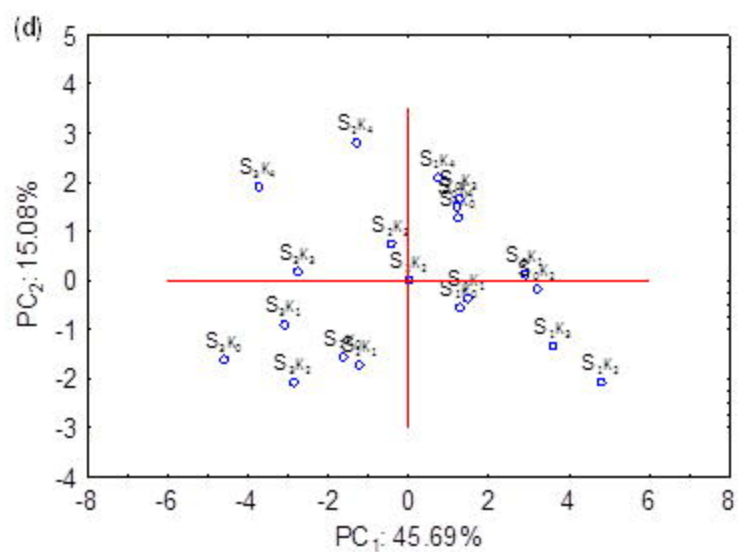

Source: https://www.biorxiv.org/content/10.1101/657767v1.full.pdf
